# Supplementary material for: Screening efficient Pt-based dual-metal atomic-level catalysts for the oxygen reduction reaction
Source: Royal Society of Chemistry journal article supplement (doi:10.1039/d5ta00134j), 2025-01-01
Supplement: d5ta00134j1.pdf [file d5ta00134j1.pdf]

## Supporting Information for

# Screening Efficient Pt-based Dual-Metal Atomic-Level Catalysts for Oxygen Reduction Reaction

Jing Jia<sup>§</sup>, Xu Zhang<sup>§</sup>, Bingyi Song, Hira Hamid, and Li-Ming Yang\*

*Key Laboratory of Material Chemistry for Energy Conversion and Storage, Ministry of Education; Hubei Key Laboratory of Materials Chemistry and Service Failure; Hubei Key Laboratory of Bioinorganic Chemistry and Materia Medica; Hubei Engineering Research Center for Biomaterials and Medical Protective Materials; School of Chemistry and Chemical Engineering, Huazhong University of Science and Technology, Wuhan 430074, China. (email: [Lmyang@hust.edu.cn](mailto:Lmyang@hust.edu.cn))*

**Table S1.** The crystal structure, lattice parameters (Å), space groups, point groups, magnetic moments (with order of Pt, TM and total/ $\mu_B$ ) and Pt-M bond length of optimized crystal structures of 30 PtM-N<sub>6</sub>@Gra catalysts. "/" represents that the energy of the corresponding catalyst has not been obtained due to the fact that the structure of target catalyst cannot be obtained after structural relaxation.

**Table S2.** The crystal structure, lattice parameters (Å), space groups, point groups, magnetic moments (with order of Pt, TM and total/ $\mu_B$ ) and Pt-M bond length of optimized crystal structures of 30 PtM-C<sub>6</sub>@Gra catalysts. "/" represents that the energy of the corresponding catalyst has not been obtained due to the fact that the structure of target catalyst cannot be obtained after structural relaxation.

**Table S3.** The crystal structure, lattice parameters (Å), space groups, point groups, magnetic moments (with order of Pt, TM and total/ $\mu_B$ ) and Pt-M bond length of optimized crystal structures of 30 PtM-B<sub>6</sub>@Gra catalysts. "/" represents that the energy of the corresponding catalyst has not been obtained due to the fact that the structure of target catalyst cannot be obtained after structural relaxation.

**Figure S1.** The results from computer aided screening for PtM-C<sub>6</sub>@Gra (a1-e1) and PtM-B<sub>6</sub>@Gra (a2-e2). The red dashed lines refer to 0.00 eV. The blue and magenta dashed lines refer to 0.50 and 0.00 eV, respectively. In Figure e2, f2, the blue and magenta dashed lines refer to 1.00 and 0.25 eV, respectively.

**Figure S2.** Schematic illustration of different hydrogenation sites for the second protonation  $\Delta G^*_{O_2 \rightarrow *OOH}$  of PtM-L<sub>6</sub>@Gra catalysts, named PtM.1-L<sub>6</sub>@Gra and PtM.2-L<sub>6</sub>@Gra, respectively.

**Table S4.** The Gibbs free energy profiles and the relevant intermediate species of different reaction pathways for 16 selected catalysts.

**Table S5.** Summary of the most favorable pathways of PtM-L<sub>6</sub>@Gra catalysts under the acidic condition (pH=0), Gibbs free energy of the corresponding intermediates (eV), overpotentials (V), and potential-determining step (PDS) are listed.

**Table S6.** Summary of the most favorable pathways of PtM-L<sub>6</sub>@Gra catalysts under the basic condition (pH=13), Gibbs free energy of the corresponding intermediates (eV), overpotentials (V), and PDS are listed.

**Table S7.** Thermal corrections (eV) of small molecule (H<sub>2</sub>O, H<sub>2</sub>) and the reaction intermediates (O<sub>x</sub>H<sub>y</sub>) along the most favorable pathways on PtM-L<sub>6</sub>@Gra. Thermal corrections of the small molecules (H<sub>2</sub>O, H<sub>2</sub>) can be obtained from the NIST database.

**Figure S3.** Calculated PDOS of various intermediates (\*OOH, \*O, \*OH) adsorption on the active site of (a1-a3) PtFe-N<sub>6</sub>@Gra, (b1-b3) PtCo-N<sub>6</sub>@Gra, (c1-c3) PtNi-N<sub>6</sub>@Gra, (d1-d3) PtCo-C<sub>6</sub>@Gra, (e1-e3) PtNi-C<sub>6</sub>@Gra, (f1-f3) PtZn-C<sub>6</sub>@Gra.

**Table S8.** The magnetic moment before and after O<sub>2</sub> adsorption. (\*) and (\*O<sub>2</sub>) stand for before and after O<sub>2</sub> adsorption on the selected catalysts, respectively. The M represents the transition metal atom, the L<sub>6</sub> represents the six coordination atoms connected to the Pt and M atom, and the FV-Gra represents the rest part except the Pt, M and L<sub>6</sub> atoms. The positive and negative charge values represent gain and loss of electrons, respectively.

**Figure S4.** Schematic diagram of (a) the definition of the six coordination atoms connected to Pt and M (L1-L6), and adsorbed O<sub>2</sub>. O1 represents that O is close to the metal, O2 represents that O is far away from the metal, respectively. The Bader charge diagrams of each part (i.e., L1-L6, Pt, M, O1, O2) of the 21 catalysts (b) before and (c) after O<sub>2</sub> adsorption.

**Table S9.** Bader charge of each part of 21 catalysts before adsorbing O<sub>2</sub>, the labels of different atoms following Figure S4a.

**Table S10.** Bader charge of each part of 21 catalysts after adsorbing O<sub>2</sub>, the labels of different atoms following Figure S4a.

**Figure S5.** Schematic diagram of the definition of the three moieties for the intermediate species. Moiety 1, 2 and 3 represent the PtM-L<sub>6</sub>@Gra excluding the PtM-L<sub>6</sub> part (the PtM-L<sub>6</sub> part represent the Pt, M atoms and six coordinated atoms) (moiety 1), the PtM-L<sub>6</sub> part (moiety 2), and the adsorbed O<sub>x</sub>H<sub>y</sub> intermediate species (moiety 3), respectively.

**Table S11.** Charge variation of the three moieties (PtM-L<sub>6</sub>, O<sub>x</sub>H<sub>y</sub> and FV-Gra) along the most favorable reaction pathway on the 9 selected catalysts. The definition of moieties following Figure S5. The positive and negative charge values represent gain and loss of electrons, respectively.

**Table S12.** The d\*(Pt-M), d\*<sub>O<sub>2</sub></sub>(Pt-M), d\*<sub>OOH</sub>(Pt-M), d\*<sub>O</sub>(Pt-M), d\*<sub>OH</sub>(Pt-M) and avg[d<sub>a</sub>(Pt-M)] of 21 catalysts were listed.

**Figure S6.** The diagrams of Pt-M bond length values of 21 catalysts substrates and various intermediates. (a) d\*(Pt-M), (b) d\*<sub>O<sub>2</sub></sub>(Pt-M), (c) d\*<sub>OOH</sub>(Pt-M), (d) d\*<sub>O</sub>(Pt-M), (e) d\*<sub>OH</sub>(Pt-M), and (f) avg[d<sub>a</sub>(Pt-M)].

**Figure S7.** There is no clear structure-activity relationship between various descriptors and the limiting potential (U<sub>L</sub>) after many tentative trial and error. ΔG\*<sub>→\*O<sub>2</sub></sub> and ΔG\*<sub>O→\*OH</sub> represent the Gibbs free energy change of O<sub>2</sub> adsorption, the second protonation step under basic condition, respectively. The d\*(Pt-M), d\*<sub>O</sub>(Pt-M), d\*<sub>OH</sub>(Pt-M) represent the distance between the active center metals Pt and M of the free substrate, substrate adsorbed O intermediate, substrate adsorbed OH intermediate, respectively. avg[d<sub>a</sub>(Pt-M)] represents the average value of the distance of the active center metals Pt and M of the substrates and intermediates.

**Table S13.** The O-O bond length (Å) of free O<sub>2</sub> (g), \*O<sub>2</sub> and \*OOH on the 16 selected PtM-L<sub>6</sub>@Gra catalysts.

**Table S14.** The calculated cohesive energies (E<sub>c</sub>, eV/atom) of PtM bulk and the binding energies (E<sub>b</sub>, eV/atom) of Pt and M atoms embedded in N<sub>6</sub>@Gra substrate, and the binding energy along with the cohesive energy (E<sub>b</sub>+E<sub>c</sub>). "/" represents that the energy of the corresponding catalyst has not been obtained.

**Table S15.** The calculated cohesive energies (E<sub>c</sub>, eV/atom) of PtM bulk and the binding energies (E<sub>b</sub>, eV/atom) of Pt and M atoms embedded in C<sub>6</sub>@Gra substrate, and the binding energy along with the

cohesive energy ( $E_b+E_c$ ). "/" represents that the energy of the corresponding catalyst has not been obtained.

**Table S16.** The calculated cohesive energies ( $E_c$ , eV/atom) of PtM bulk and the binding energies ( $E_b$ , eV/atom) of Pt and M atoms embedded in  $B_6@Gra$  substrate, and the binding energy along with the cohesive energy ( $E_b+E_c$ ). "/" represents that the energy of the corresponding catalyst has not been obtained.

**Table S17.** The calculated binding energy of the Pt and M atoms embedded in  $PtM-L_6@Gra$  ( $E_b$ , eV), standard dissolution potentials ( $U_{diss}^0$ , pH = 0), number of electrons ( $N_e$ ) involved in the dissolution for the pure metals, and computed dissolution potentials ( $U_{diss}^{Pt}$ ,  $U_{diss}^M$ ) for DACs. The minimum dissolution potential ( $U_{diss}^{min}$ ) is taken to represent the dissolution potential of the whole system.

**Figure S8.** The variations of total energy and temperature during AIMD simulations of (a) PtCo- $C_6@Gra$ , (b) PtNi- $C_6@Gra$ , (c) PtZn- $C_6@Gra$ , (d) PtFe- $N_6@Gra$ , (e) PtNi- $N_6@Gra$ , (f) PtCo- $N_6@Gra$  catalysts under 500 K for 10 ps with a time step of 2 fs.

**Table S1.** The crystal structure, lattice parameters (Å), space groups, point groups, magnetic moments (with order of Pt, TM and total/ $\mu_B$ ) and Pt-M bond length of optimized crystal structures of 30 PtM-N<sub>6</sub>@Gra catalysts. "/" represents that the energy of the corresponding catalyst has not been obtained due to the fact that the structure of target catalyst cannot be obtained after structural relaxation.

| PtM-N <sub>6</sub> @Gra | Crystal structure (top and side views)                                              | Lattice constant                    | Space group | Point group    | Magnetic moment      | Pt-M Bond length |
|-------------------------|-------------------------------------------------------------------------------------|-------------------------------------|-------------|----------------|----------------------|------------------|
| Ag                      | 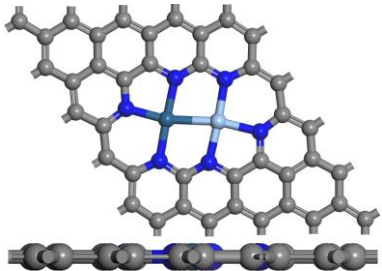   | a = 12.26<br>b = 12.67<br>c = 15.37 | Pm (#6)     | C <sub>s</sub> | 0.00<br>0.00<br>0.00 | 2.436            |
| Au                      |   | a = 12.27<br>b = 12.69<br>c = 15.36 | Pm (#6)     | C <sub>s</sub> | 0.00<br>0.00<br>0.00 | 2.440            |
| Cd                      |  | a = 12.29<br>b = 12.71<br>c = 15.27 | Pm (#6)     | C <sub>s</sub> | 0.38<br>0.14<br>0.91 | 2.473            |
| Co                      |  | a = 12.21<br>b = 12.62<br>c = 15.52 | Pm (#6)     | C <sub>s</sub> | 0.05<br>1.25<br>1.23 | 2.340            |
| Cr                      |  | a = 12.19<br>b = 12.62<br>c = 15.48 | Pm (#6)     | C <sub>s</sub> | 0.01<br>3.05<br>2.82 | 2.312            |

|    |                                                                                     |                                     |         |                |                      |       |
|----|-------------------------------------------------------------------------------------|-------------------------------------|---------|----------------|----------------------|-------|
| Cu | 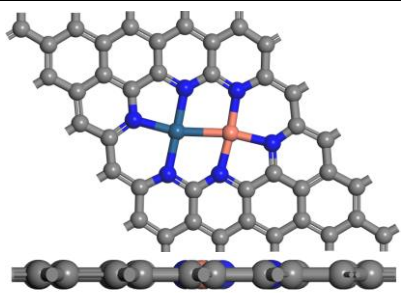   | a = 12.21<br>b = 12.56<br>c = 15.51 | Pm (#6) | C <sub>s</sub> | 0.00<br>0.00<br>0.00 | 2.413 |
| Fe |    | a = 12.21<br>b = 12.62<br>c = 15.50 | Pm (#6) | C <sub>s</sub> | 0.12<br>2.55<br>2.65 | 2.327 |
| Hf |   | a = 12.29<br>b = 12.75<br>c = 15.23 | Pm (#6) | C <sub>s</sub> | 0.00<br>0.06<br>0.05 | 2.353 |
| Ir |  | a = 12.26<br>b = 12.70<br>c = 15.38 | Pm (#6) | C <sub>s</sub> | 0.04<br>0.12<br>0.17 | 2.403 |
| La |  | a = 12.35<br>b = 12.80<br>c = 15.03 | Pm (#6) | C <sub>s</sub> | 0.34<br>0.17<br>0.73 | 2.430 |
| Mn |  | a = 12.20<br>b = 12.62<br>c = 15.45 | Pm (#6) | C <sub>s</sub> | 0.07<br>3.44<br>3.35 | 2.319 |

|    |                                                                                     |                                     |            |                 |                      |       |
|----|-------------------------------------------------------------------------------------|-------------------------------------|------------|-----------------|----------------------|-------|
| Mo | 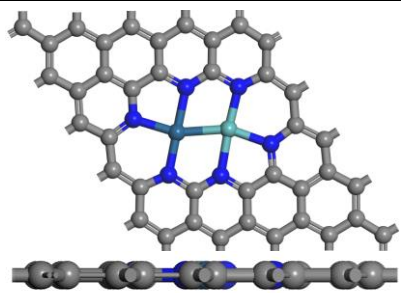   | a = 12.22<br>b = 12.67<br>c = 15.37 | Pm (#6)    | C <sub>s</sub>  | 0.00<br>1.54<br>1.51 | 2.336 |
| Nb |    | a = 12.25<br>b = 12.71<br>c = 15.30 | Pm (#6)    | C <sub>s</sub>  | 0.01<br>0.72<br>0.58 | 2.329 |
| Ni |   | a = 12.21<br>b = 12.61<br>c = 15.52 | Pm (#6)    | C <sub>s</sub>  | 0.00<br>0.00<br>0.00 | 2.368 |
| Os |  | a = 12.22<br>b = 12.68<br>c = 15.40 | Pm (#6)    | C <sub>s</sub>  | 0.31<br>1.32<br>1.79 | 2.381 |
| Pd |  | a = 12.26<br>b = 12.68<br>c = 15.37 | Pm (#6)    | C <sub>s</sub>  | 0.00<br>0.00<br>0.00 | 2.410 |
| Pt |  | a = 12.27<br>b = 12.70<br>c = 15.38 | P2/m (#10) | C <sub>2h</sub> | 0.00<br>0.00<br>0.00 | 2.425 |

|    |                                                                                     |                                     |         |                |                      |       |
|----|-------------------------------------------------------------------------------------|-------------------------------------|---------|----------------|----------------------|-------|
| Rh | 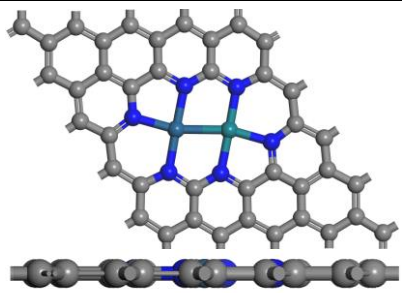   | a = 12.24<br>b = 12.68<br>c = 15.40 | Pm (#6) | C <sub>s</sub> | 0.26<br>0.49<br>0.86 | 2.406 |
| Ru |    | a = 12.20<br>b = 12.63<br>c = 15.44 | Pm (#6) | C <sub>s</sub> | 0.30<br>1.46<br>1.92 | 2.361 |
| Sc |   | a = 12.29<br>b = 12.73<br>c = 15.25 | Pm (#6) | C <sub>s</sub> | 0.00<br>0.00<br>0.00 | 2.301 |
| Ta |  | a = 12.26<br>b = 12.73<br>c = 15.29 | Pm (#6) | C <sub>s</sub> | 0.00<br>0.65<br>0.57 | 2.344 |
| Tc |  | a = 12.20<br>b = 12.64<br>c = 15.42 | Pm (#6) | C <sub>s</sub> | 0.07<br>1.58<br>1.66 | 2.348 |
| Ti |  | a = 12.24<br>b = 12.68<br>c = 15.36 | Pm (#6) | C <sub>s</sub> | 0.00<br>0.00<br>0.00 | 2.257 |



|    |                                                                                     |                                     |         |                |                      |         |
|----|-------------------------------------------------------------------------------------|-------------------------------------|---------|----------------|----------------------|---------|
| V  | 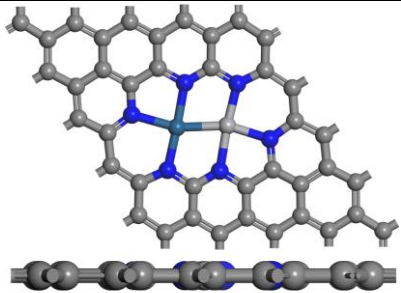   | a = 12.21<br>b = 12.65<br>c = 15.42 | Pm (#6) | C <sub>s</sub> | 0.13<br>1.54<br>1.20 | 2.260   |
| W  |    | a = 12.23<br>b = 12.70<br>c = 15.35 | Pm (#6) | C <sub>s</sub> | 0.03<br>1.21<br>1.29 | 2.347   |
| Y  |   | a = 12.33<br>b = 12.78<br>c = 15.12 | Pm (#6) | C <sub>s</sub> | 0.14<br>1.11<br>0.35 | 2.401   |
| Zn |  | a = 12.23<br>b = 12.65<br>c = 15.40 | Pm (#6) | C <sub>s</sub> | 0.40<br>0.13<br>0.91 | 2.4302. |
| Zr |  | a = 12.33<br>b = 12.78<br>c = 15.12 | Pm (#6) | C <sub>s</sub> | 0.00<br>0.00<br>0.00 | 2.341   |
| Re |  | a = 12.28<br>b = 12.75<br>c = 15.21 | Pm (#6) | C <sub>s</sub> | 0.26<br>2.18<br>2.45 | 2.393   |
| Hg | /                                                                                   | /                                   | /       | /              | /                    | /       |



**Table S2.** The crystal structure, lattice parameters (Å), space groups, point groups, magnetic moments (with order of Pt, TM and total/ $\mu_B$ ) and Pt-M bond length of optimized crystal structures of 30 PtM-C<sub>6</sub>@Gra catalysts. "/" represents that the energy of the corresponding catalyst has not been obtained due to the fact that the structure of target catalyst cannot be obtained after structural relaxation.

| PtM-C <sub>6</sub> @Gra | Crystal structure (top and side views)                                              | Lattice constant                    | Space group | Point group    | Magnetic moment      | Pt-M Bond length |
|-------------------------|-------------------------------------------------------------------------------------|-------------------------------------|-------------|----------------|----------------------|------------------|
| Ag                      | 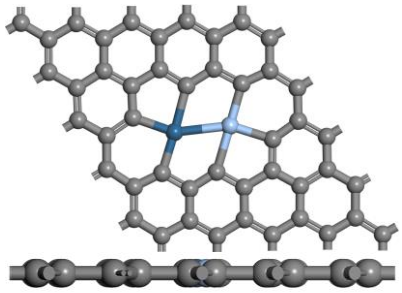   | a = 12.33<br>b = 12.59<br>c = 15.21 | Pm (#6)     | C <sub>s</sub> | 0.00<br>0.00<br>0.00 | 2.492            |
| Au                      |   | a = 12.33<br>b = 12.62<br>c = 15.20 | Pm (#6)     | C <sub>s</sub> | 0.00<br>0.00<br>0.00 | 2.494            |
| Cd                      |  | a = 12.37<br>b = 12.68<br>c = 15.11 | Pm (#6)     | C <sub>s</sub> | 0.10<br>0.13<br>0.81 | 2.517            |
| Co                      |  | a = 12.28<br>b = 12.53<br>c = 15.35 | Pm (#6)     | C <sub>s</sub> | 0.01<br>1.21<br>1.12 | 2.417            |
| Cr                      |  | a = 12.34<br>b = 12.48<br>c = 15.32 | Pm (#6)     | C <sub>s</sub> | 0.04<br>2.95<br>2.97 | 2.459            |

|    |  |                                     |         |                |                      |       |
|----|--|-------------------------------------|---------|----------------|----------------------|-------|
| Cu |  | a = 12.29<br>b = 12.50<br>c = 15.35 | Pm (#6) | C <sub>s</sub> | 0.00<br>0.00<br>0.00 | 2.423 |
| Fe |  | a = 12.29<br>b = 12.54<br>c = 15.33 | Pm (#6) | C <sub>s</sub> | 0.02<br>2.57<br>2.56 | 2.469 |
| Hf |  | a = 12.40<br>b = 12.60<br>c = 15.07 | Pm (#6) | C <sub>s</sub> | 0.00<br>0.00<br>0.00 | 2.556 |
| Hg |  | a = 12.37<br>b = 12.72<br>c = 15.10 | Pm (#6) | C <sub>s</sub> | 0.15<br>0.16<br>0.81 | 2.525 |
| Ir |  | a = 12.31<br>b = 12.64<br>c = 15.21 | Pm (#6) | C <sub>s</sub> | 0.00<br>0.05<br>0.05 | 2.435 |
| La |  | a = 12.46<br>b = 12.72<br>c = 15.95 | Pm (#6) | C <sub>s</sub> | 0.00<br>0.15<br>0.50 | 2.384 |

|    |                                                                                     |                                     |         |                |                      |       |
|----|-------------------------------------------------------------------------------------|-------------------------------------|---------|----------------|----------------------|-------|
| Mn | 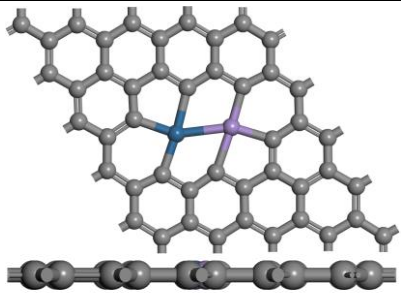   | a = 12.30<br>b = 12.53<br>c = 15.30 | Pm (#6) | C <sub>s</sub> | 0.01<br>3.48<br>3.34 | 2.467 |
| Mo |    | a = 12.38<br>b = 12.51<br>c = 15.22 | Pm (#6) | C <sub>s</sub> | 0.02<br>1.50<br>1.52 | 2.435 |
| Nb |   | a = 12.39<br>b = 12.54<br>c = 15.16 | Pm (#6) | C <sub>s</sub> | 0.01<br>0.61<br>0.60 | 2.439 |
| Ni |  | a = 12.29<br>b = 12.51<br>c = 15.36 | Pm (#6) | C <sub>s</sub> | 0.00<br>0.00<br>0.00 | 2.441 |
| Os |  | a = 12.32<br>b = 12.66<br>c = 15.18 | Pm (#6) | C <sub>s</sub> | 0.08<br>1.10<br>1.11 | 2.399 |
| Pd |  | a = 12.33<br>b = 12.59<br>c = 15.23 | Pm (#6) | C <sub>s</sub> | 0.00<br>0.00<br>0.00 | 2.482 |

|    |                                                                                     |                                     |               |                 |                      |       |
|----|-------------------------------------------------------------------------------------|-------------------------------------|---------------|-----------------|----------------------|-------|
| Pt | 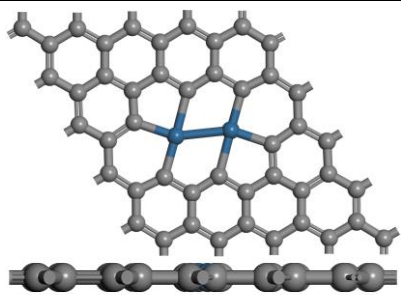   | a = 12.32<br>b = 12.62<br>c = 15.22 | P2/m<br>(#10) | C <sub>2h</sub> | 0.00<br>0.00<br>0.00 | 2.476 |
| Rh |    | a = 12.32<br>b = 12.61<br>c = 15.23 | Pm (#6)       | C <sub>s</sub>  | 0.04<br>0.43<br>0.50 | 2.452 |
| Ru |   | a = 12.32<br>b = 12.62<br>c = 15.21 | Pm (#6)       | C <sub>s</sub>  | 0.06<br>1.09<br>1.10 | 2.415 |
| Sc |  | a = 12.39<br>b = 12.59<br>c = 15.10 | Pm (#6)       | C <sub>s</sub>  | 0.00<br>0.00<br>0.00 | 2.545 |
| Ta |  | a = 12.38<br>b = 12.55<br>c = 15.14 | Pm (#6)       | C <sub>s</sub>  | 0.02<br>0.63<br>0.61 | 2.445 |
| Tc |  | a = 12.37<br>b = 12.56<br>c = 15.20 | Pm (#6)       | C <sub>s</sub>  | 0.05<br>2.52<br>2.66 | 2.520 |

|    |                                                                                     |                                     |         |                |                      |       |
|----|-------------------------------------------------------------------------------------|-------------------------------------|---------|----------------|----------------------|-------|
| Ti | 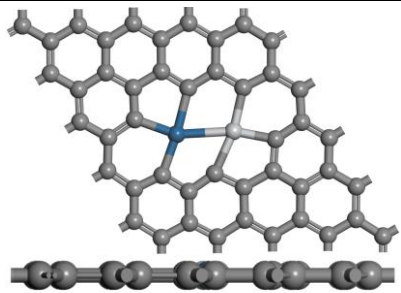   | a = 12.36<br>b = 12.53<br>c = 15.21 | Pm (#6) | C <sub>s</sub> | 0.00<br>0.00<br>0.00 | 2.548 |
| V  |    | a = 12.35<br>b = 12.51<br>c = 15.27 | Pm (#6) | C <sub>s</sub> | 0.02<br>1.43<br>1.26 | 2.553 |
| W  |   | a = 12.38<br>b = 12.51<br>c = 15.21 | Pm (#6) | C <sub>s</sub> | 0.03<br>1.23<br>1.33 | 2.439 |
| Y  |  | a = 12.44<br>b = 12.64<br>c = 15.97 | Pm (#6) | C <sub>s</sub> | 0.03<br>0.19<br>0.76 | 2.515 |
| Zn |  | a = 12.33<br>b = 12.64<br>c = 15.23 | Pm (#6) | C <sub>s</sub> | 0.06<br>0.11<br>0.58 | 2.491 |
| Zr |  | a = 12.41<br>b = 12.59<br>c = 15.06 | Pm (#6) | C <sub>s</sub> | 0.00<br>0.00<br>0.00 | 2.579 |

|    |                                                                                   |                                           |         |       |                      |       |
|----|-----------------------------------------------------------------------------------|-------------------------------------------|---------|-------|----------------------|-------|
| Re | 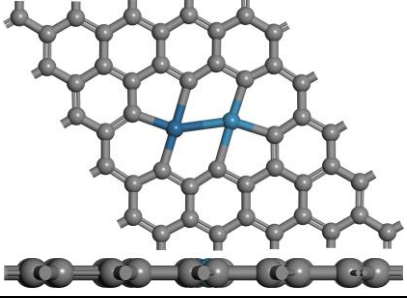 | $a = 12.41$<br>$b = 12.59$<br>$c = 15.06$ | Pm (#6) | $C_s$ | 0.10<br>2.29<br>2.50 | 2.498 |
|----|-----------------------------------------------------------------------------------|-------------------------------------------|---------|-------|----------------------|-------|



**Table S3.** The crystal structure, lattice parameters (Å), space groups, point groups, magnetic moments (with order of Pt, TM and total/ $\mu_B$ ) and Pt-M bond length of optimized crystal structures of 30 PtM-B<sub>6</sub>@Gra catalysts. "/" represents that the energy of the corresponding catalyst has not been obtained due to the fact that the structure of target catalyst cannot be obtained after structural relaxation.

| PtM-B <sub>6</sub> @Gra | Crystal structure (top and side views) | Lattice constant                    | Space group | Point group    | Magnetic moment      | Pt-M Bond length |
|-------------------------|----------------------------------------|-------------------------------------|-------------|----------------|----------------------|------------------|
| Ag                      |                                        | a = 12.66<br>b = 12.50<br>c = 15.86 | Pm (#6)     | C <sub>s</sub> | 0.08<br>0.06<br>0.39 | 2.448            |
| Au                      |                                        | a = 12.66<br>b = 12.54<br>c = 15.84 | Pm (#6)     | C <sub>s</sub> | 0.00<br>0.00<br>0.00 | 2.471            |
| Cd                      |                                        | a = 12.69<br>b = 12.49<br>c = 15.83 | Pm (#6)     | C <sub>s</sub> | 0.00<br>0.00<br>0.00 | 2.453            |
| Co                      |                                        | a = 12.58<br>b = 12.51<br>c = 15.98 | P1 (#1)     | C <sub>1</sub> | 0.07<br>1.81<br>2.14 | 2.436            |
| Cr                      |                                        | a = 12.58<br>b = 12.75<br>c = 15.80 | Pm (#6)     | C <sub>s</sub> | 0.06<br>2.35<br>1.99 | 2.309            |



|    |                                                                                     |                                     |         |                |                      |       |
|----|-------------------------------------------------------------------------------------|-------------------------------------|---------|----------------|----------------------|-------|
| Cu | 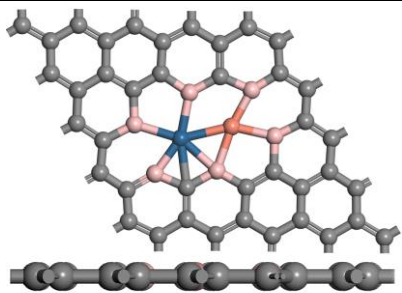   | a = 12.63<br>b = 12.37<br>c = 15.03 | Pm (#6) | C <sub>s</sub> | 0.00<br>0.00<br>0.00 | 2.326 |
| Fe |    | a = 12.61<br>b = 12.47<br>c = 15.98 | Pm (#6) | C <sub>s</sub> | 0.10<br>2.92<br>3.27 | 2.352 |
| Hf |   | a = 12.74<br>b = 12.13<br>c = 15.96 | Pm (#6) | C <sub>s</sub> | 0.00<br>0.00<br>0.00 | 2.462 |
| Ir |  | a = 12.63<br>b = 12.67<br>c = 15.85 | Pm (#6) | C <sub>s</sub> | 0.00<br>0.01<br>0.02 | 2.626 |
| La |  | a = 12.69<br>b = 12.61<br>c = 15.65 | Pm (#6) | C <sub>s</sub> | 0.00<br>0.00<br>0.00 | 2.531 |
| Mn |  | a = 12.68<br>b = 12.28<br>c = 15.04 | Pm (#6) | C <sub>s</sub> | 0.07<br>2.70<br>2.55 | 2.537 |

|    |                                                                                     |                                     |            |                 |                      |       |
|----|-------------------------------------------------------------------------------------|-------------------------------------|------------|-----------------|----------------------|-------|
| Mo | 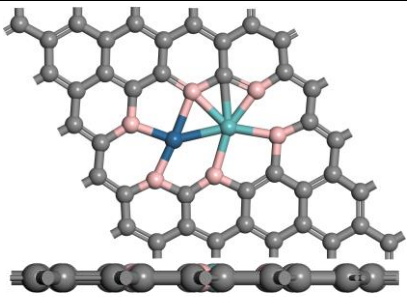   | a = 12.66<br>b = 12.40<br>c = 15.88 | Pm (#6)    | C <sub>s</sub>  | 0.11<br>0.97<br>0.57 | 2.426 |
| Nb |    | a = 12.72<br>b = 12.11<br>c = 15.02 | Pm (#6)    | C <sub>s</sub>  | 0.01<br>0.70<br>0.63 | 2.465 |
| Ni |   | a = 12.64<br>b = 12.35<br>c = 15.05 | Pm (#6)    | C <sub>s</sub>  | 0.11<br>0.66<br>1.10 | 2.322 |
| Os |  | a = 12.64<br>b = 12.65<br>c = 15.84 | Pm (#6)    | C <sub>s</sub>  | 0.04<br>1.23<br>1.47 | 2.599 |
| Pd |  | a = 12.63<br>b = 12.66<br>c = 14.86 | Pm (#6)    | C <sub>s</sub>  | 0.00<br>0.00<br>0.00 | 2.569 |
| Pt |  | a = 12.65<br>b = 12.79<br>c = 15.73 | P2/m (#10) | C <sub>2h</sub> | 0.00<br>0.00<br>0.00 | 2.974 |

|    |                                                                                     |                                     |         |                |                      |       |
|----|-------------------------------------------------------------------------------------|-------------------------------------|---------|----------------|----------------------|-------|
| Rh | 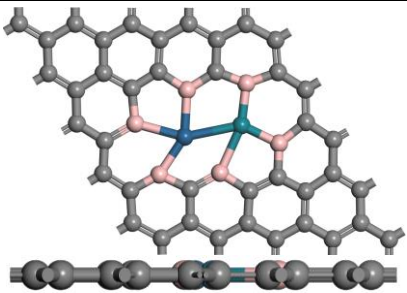   | a = 12.61<br>b = 12.61<br>c = 14.89 | Pm (#6) | C <sub>s</sub> | 0.03<br>0.33<br>0.44 | 2.566 |
| Ru |    | a = 12.63<br>b = 12.52<br>c = 14.88 | Pm (#6) | C <sub>s</sub> | 0.07<br>1.08<br>1.29 | 2.441 |
| Sc |   | a = 12.72<br>b = 12.13<br>c = 15.00 | Pm (#6) | C <sub>s</sub> | 0.00<br>0.00<br>0.00 | 2.415 |
| Ta |  | a = 12.69<br>b = 12.41<br>c = 14.82 | Pm (#6) | C <sub>s</sub> | 0.00<br>0.27<br>0.40 | 2.435 |
| Tc |  | a = 12.64<br>b = 12.48<br>c = 14.87 | Pm (#6) | C <sub>s</sub> | 0.00<br>1.08<br>0.99 | 2.422 |
| Ti |  | a = 12.71<br>b = 12.09<br>c = 15.09 | Pm (#6) | C <sub>s</sub> | 0.00<br>0.00<br>0.00 | 2.374 |

|    |                                                                                     |                                     |         |                |                      |       |
|----|-------------------------------------------------------------------------------------|-------------------------------------|---------|----------------|----------------------|-------|
| V  | 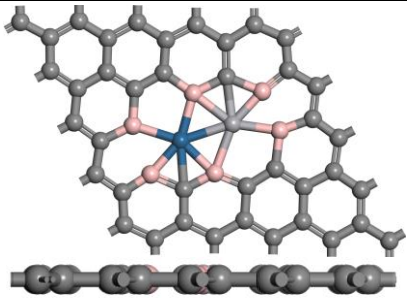   | a = 12.70<br>b = 12.18<br>c = 15.06 | Pm (#6) | C <sub>s</sub> | 0.00<br>1.19<br>0.97 | 2.343 |
| W  |    | a = 12.65<br>b = 12.46<br>c = 14.83 | Pm (#6) | C <sub>s</sub> | 0.09<br>1.05<br>1.25 | 2.432 |
| Y  |   | a = 12.68<br>b = 12.56<br>c = 14.73 | Pm (#6) | C <sub>s</sub> | 0.00<br>0.00<br>0.00 | 2.480 |
| Zn |  | a = 12.65<br>b = 12.37<br>c = 15.00 | Pm (#6) | C <sub>s</sub> | 0.00<br>0.00<br>0.00 | 2.322 |
| Zr |  | a = 12.74<br>b = 12.15<br>c = 14.94 | Pm (#6) | C <sub>s</sub> | 0.00<br>0.00<br>0.00 | 2.474 |
| Re |  | a = 12.74<br>b = 12.15<br>c = 14.94 | Pm (#6) | C <sub>s</sub> | 0.00<br>1.04<br>0.96 | 2.466 |
| Hg | /                                                                                   | /                                   | /       | /              | /                    | /     |

A Computer Aided Screening Strategy

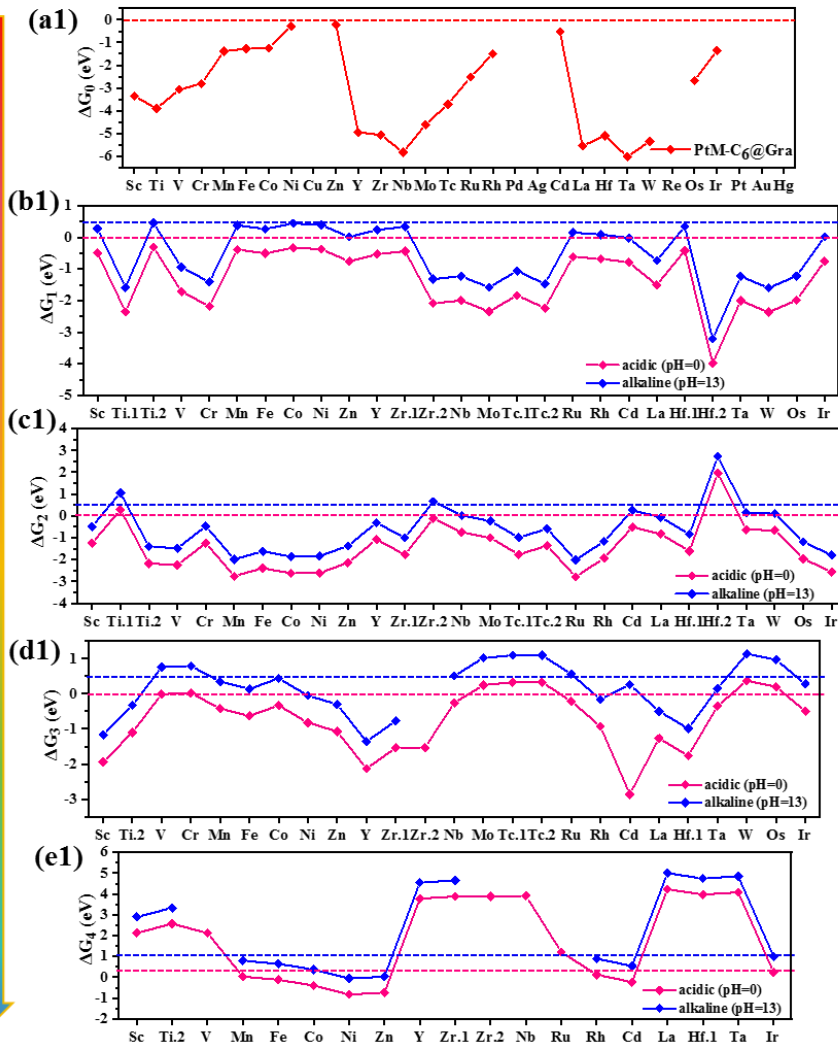

A Computer Aided Screening Strategy

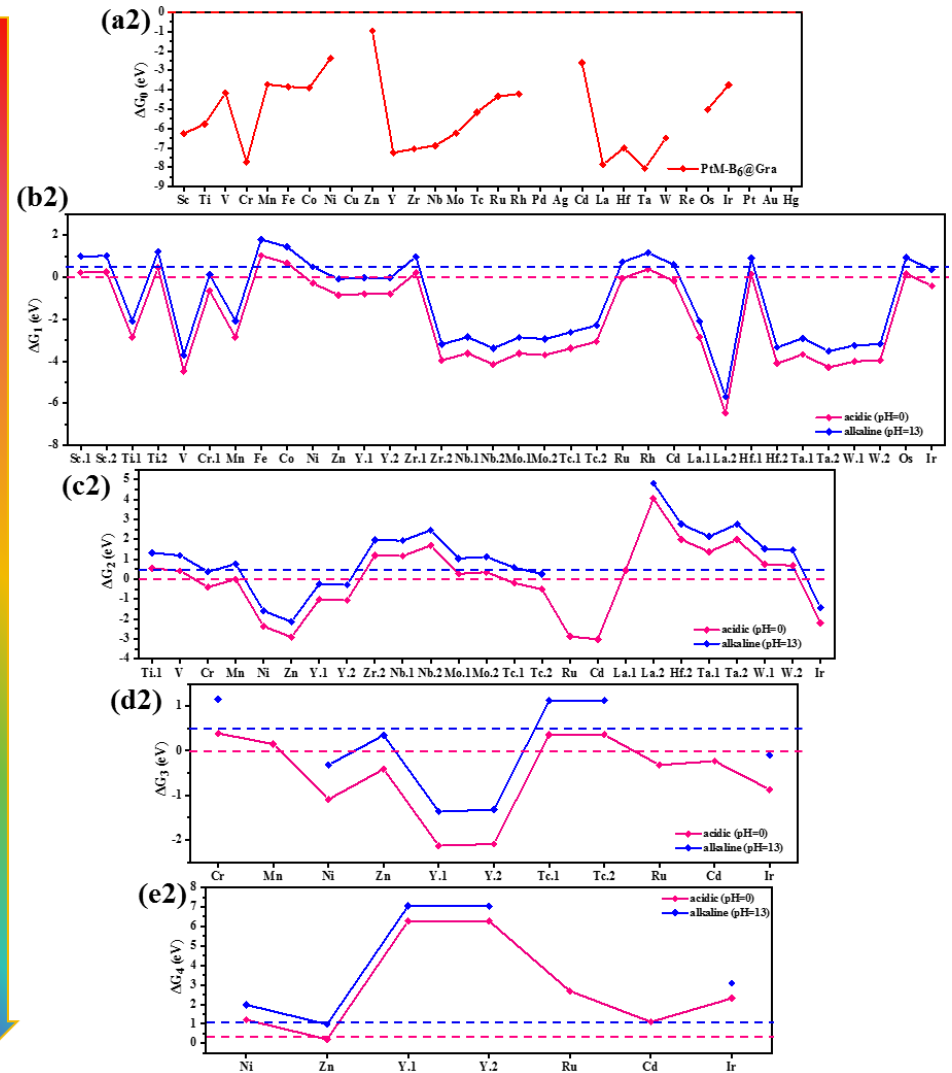

**Figure S1.** The results from computer aided screening for PtM-C<sub>6</sub>@Gra (a1-e1) and PtM-B<sub>6</sub>@Gra (a2-e2). The red dashed lines refer to 0.00 eV. The blue and magenta dashed lines refer to 0.50 and 0.00 eV, respectively. In Figure e2, f2, the blue and magenta dashed lines refer to 1.00 and 0.25 eV, respectively.



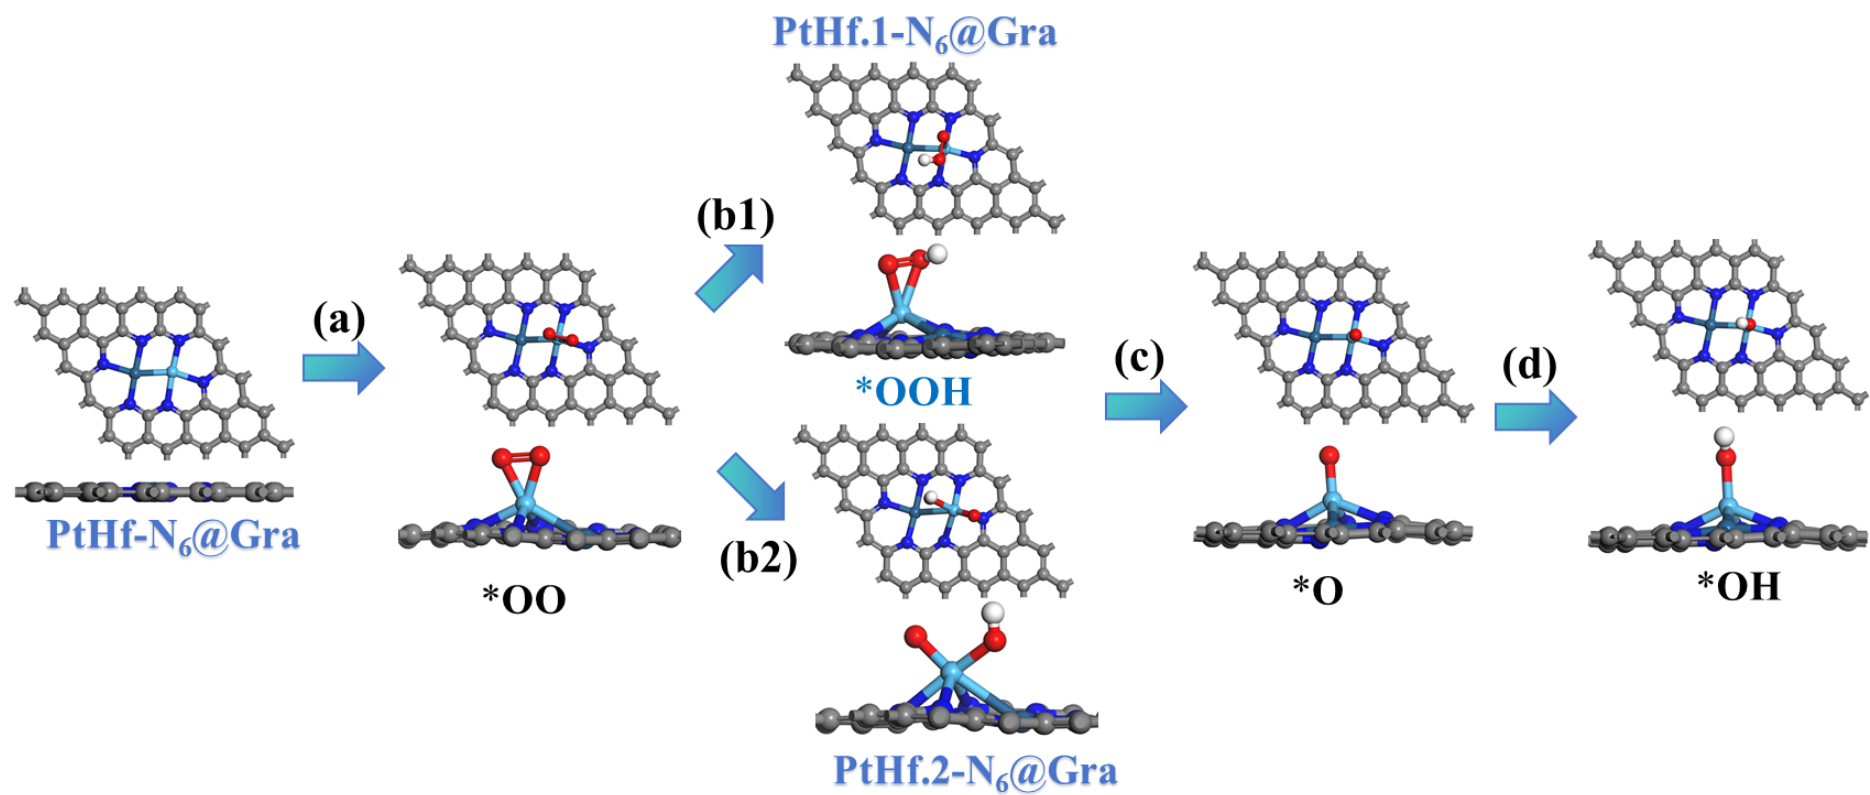

**Figure S2.** Schematic illustration of different hydrogenation sites for the second protonation  $\Delta G_{*O_2 \rightarrow *OOH}$  of PtM-L<sub>6</sub>@Gra catalysts, named PtM.1-L<sub>6</sub>@Gra and PtM.2-L<sub>6</sub>@Gra, respectively.

**Table S4.** The Gibbs free energy profiles and the relevant intermediate species of different reaction pathways for 16 selected catalysts.

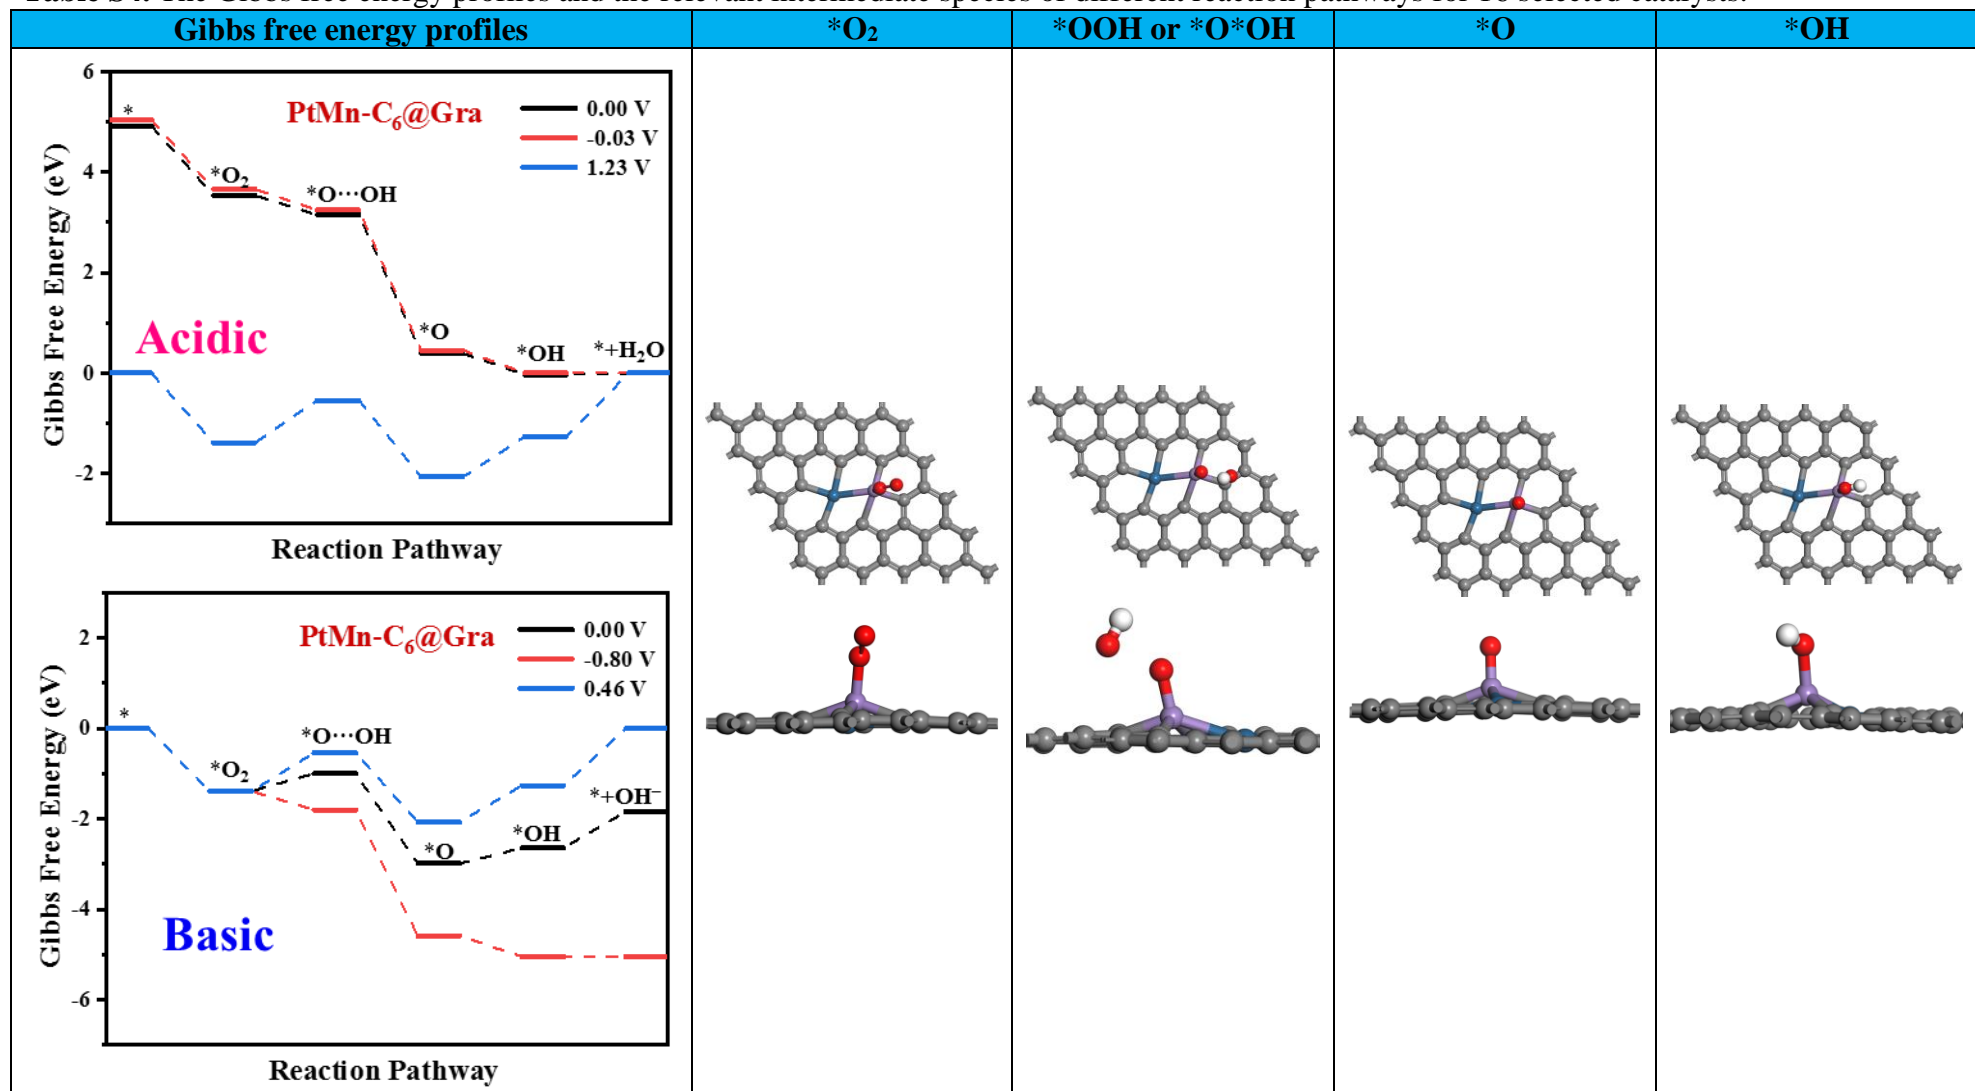



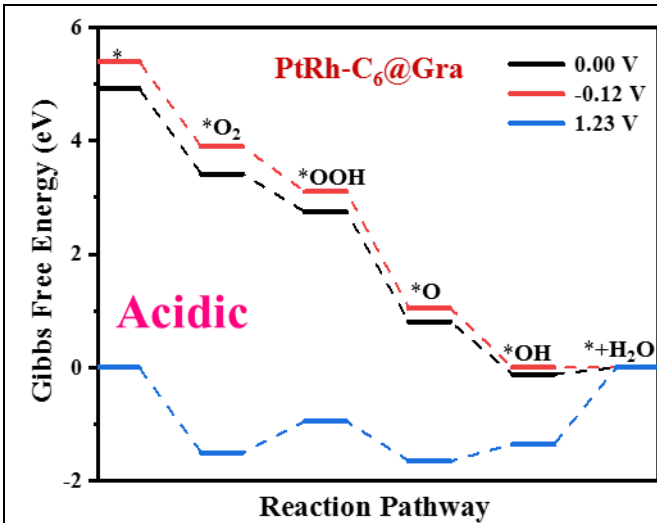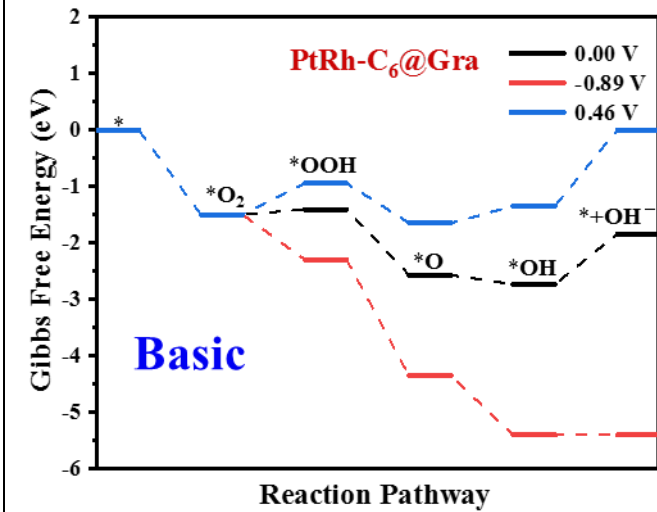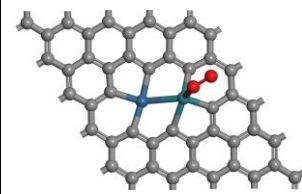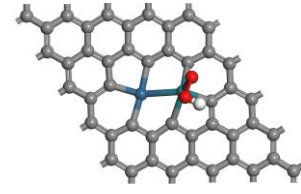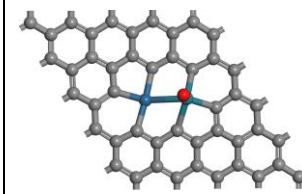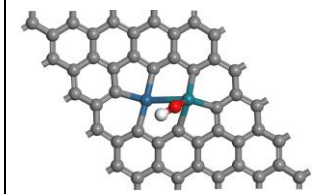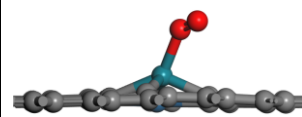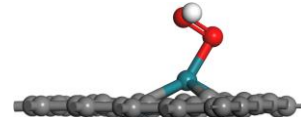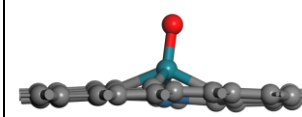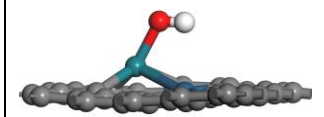

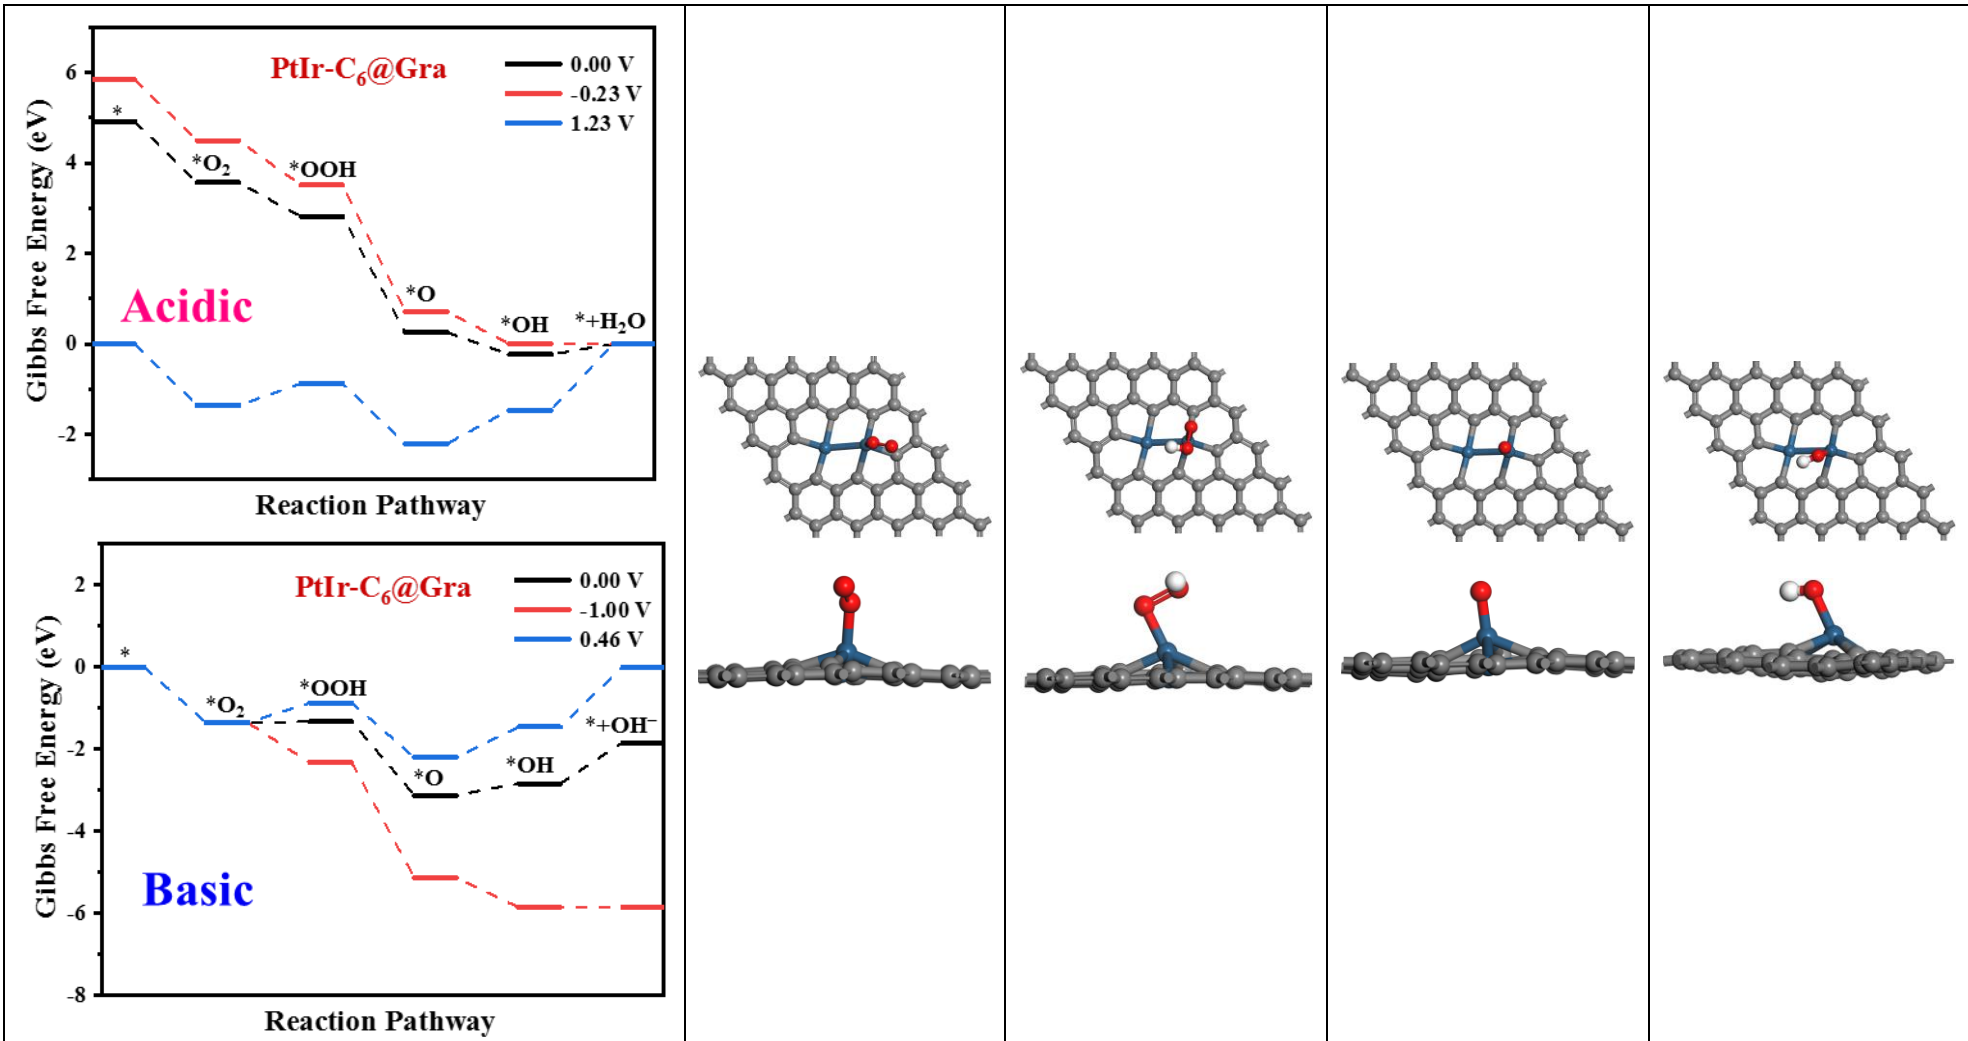

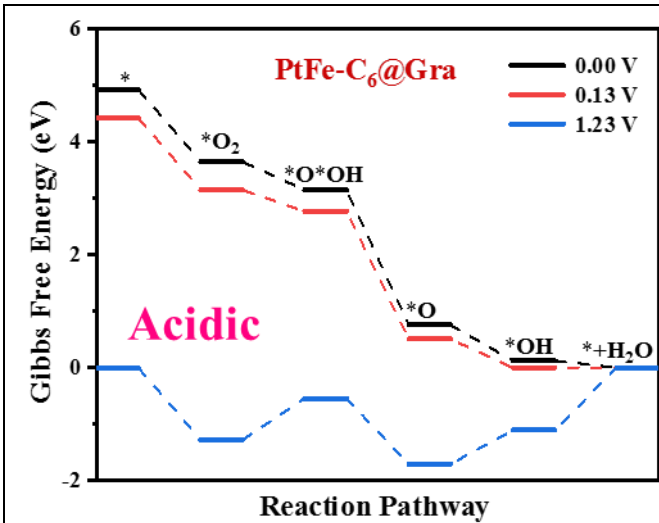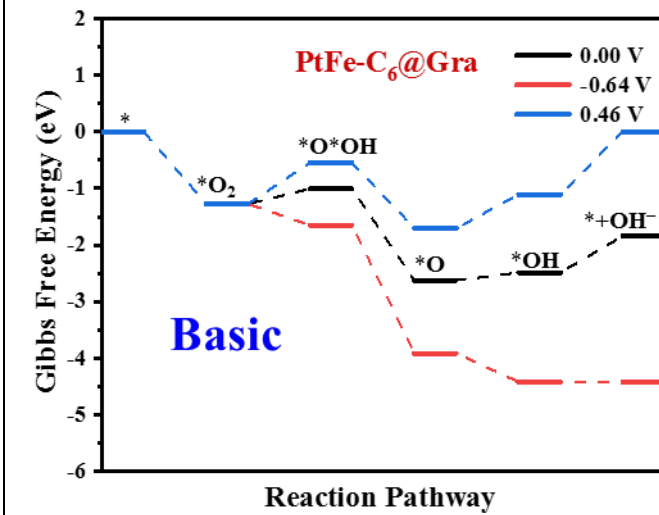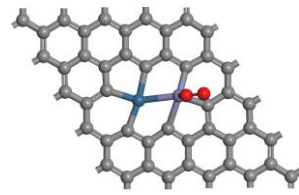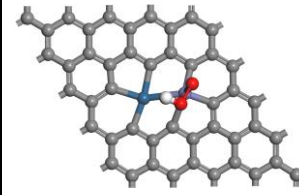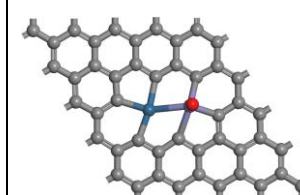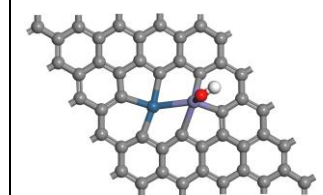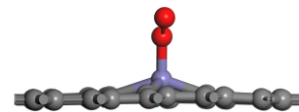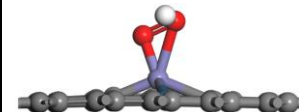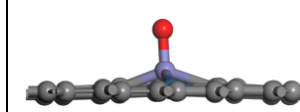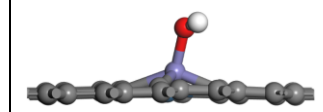

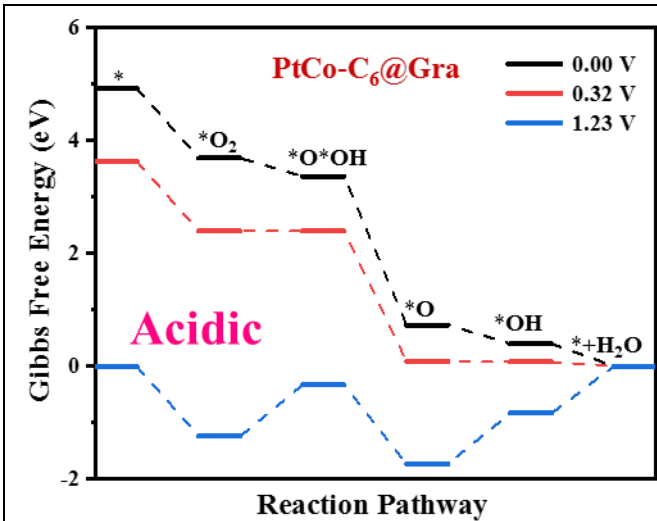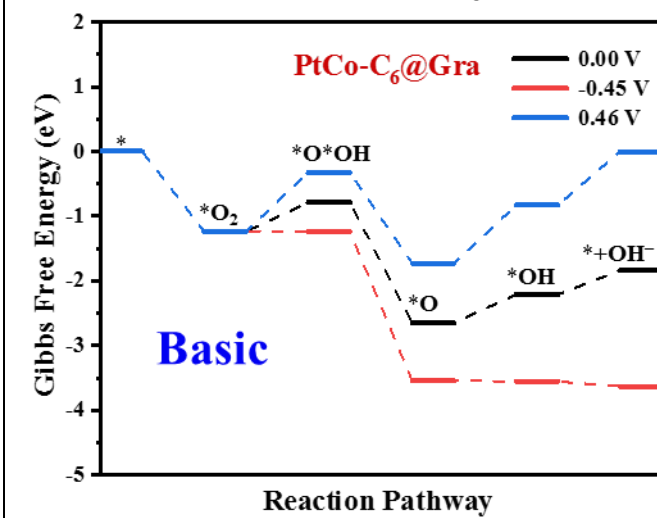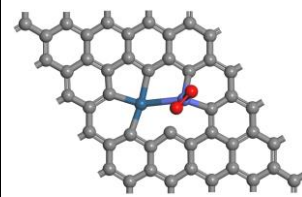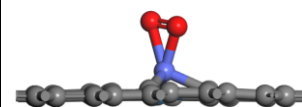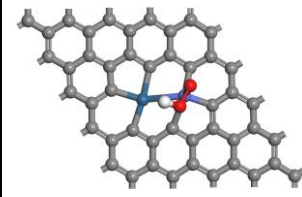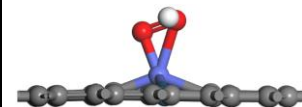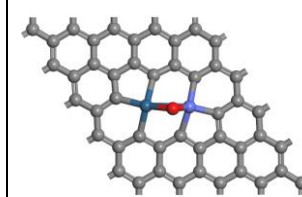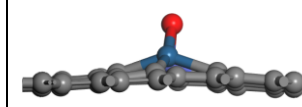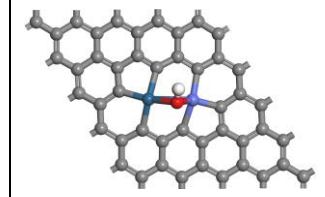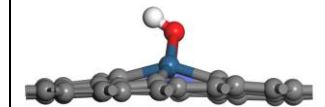

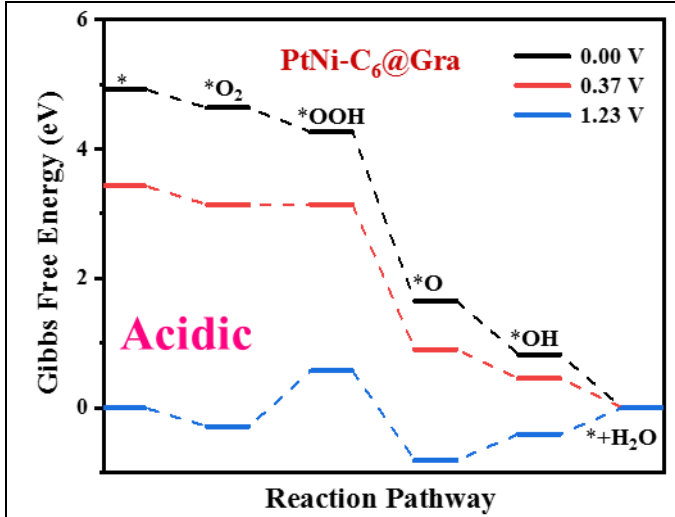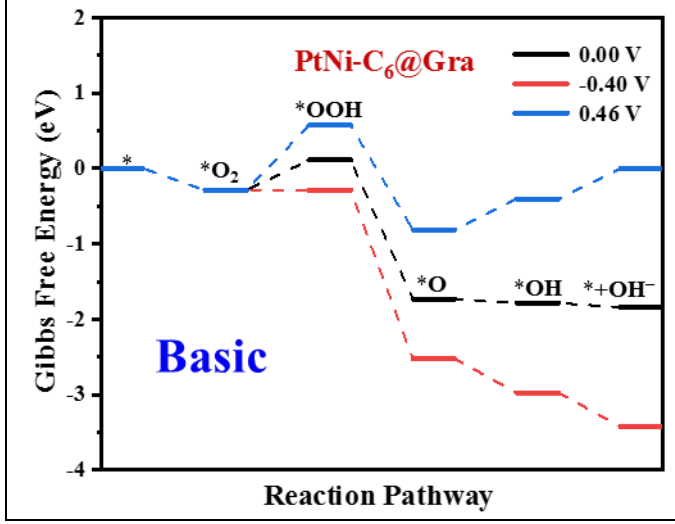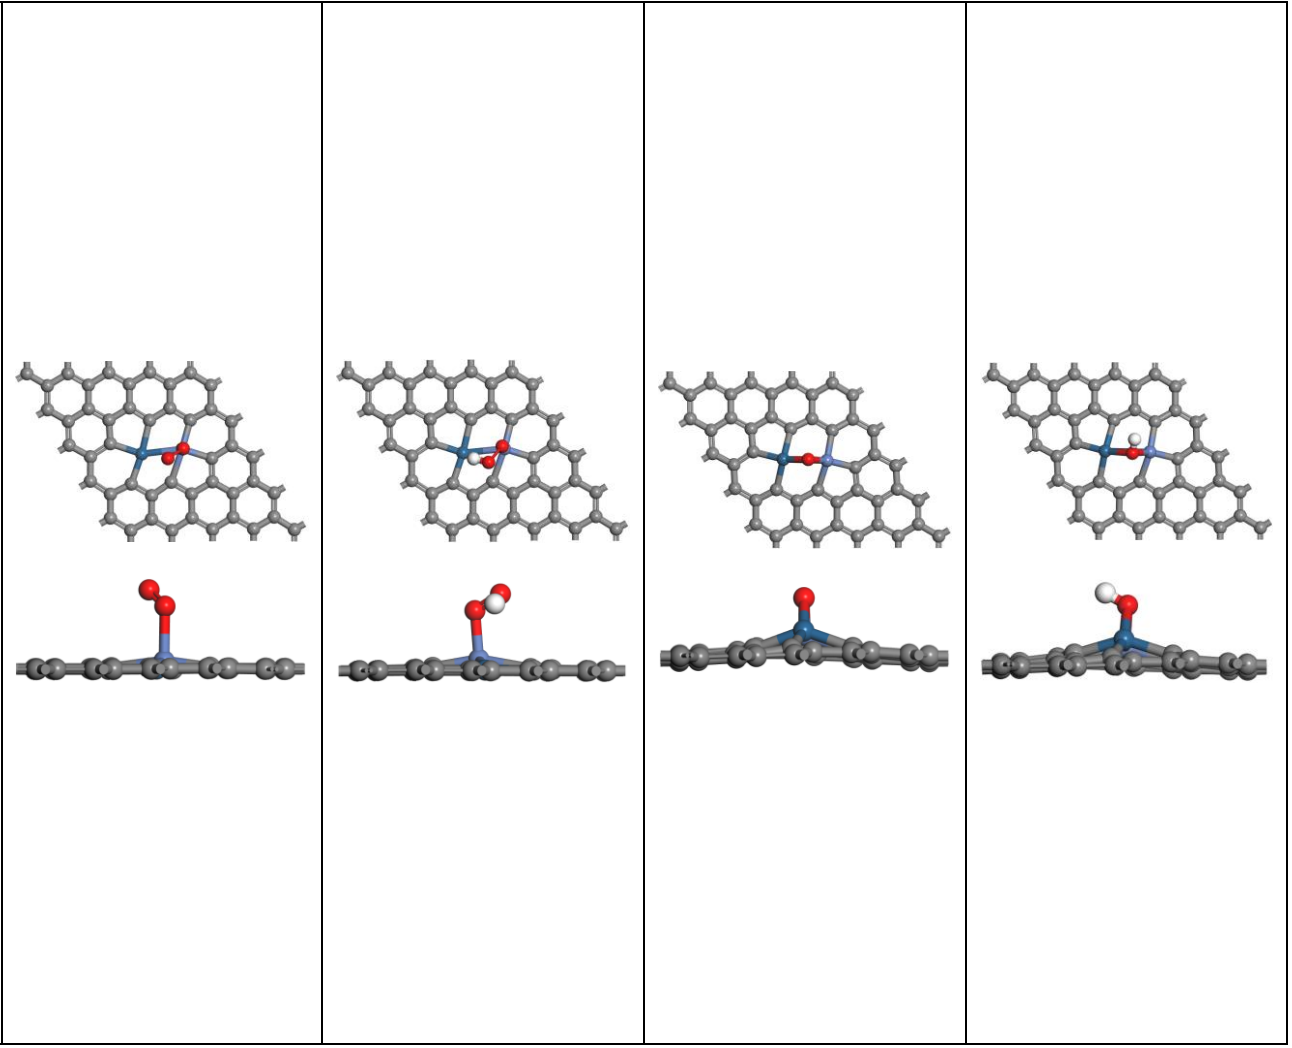

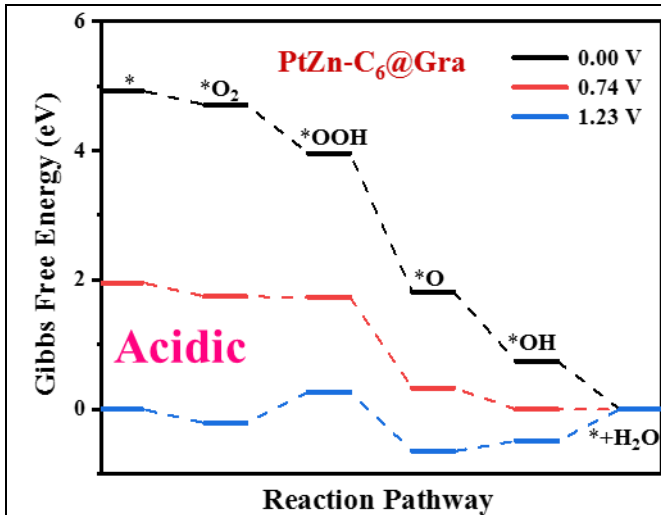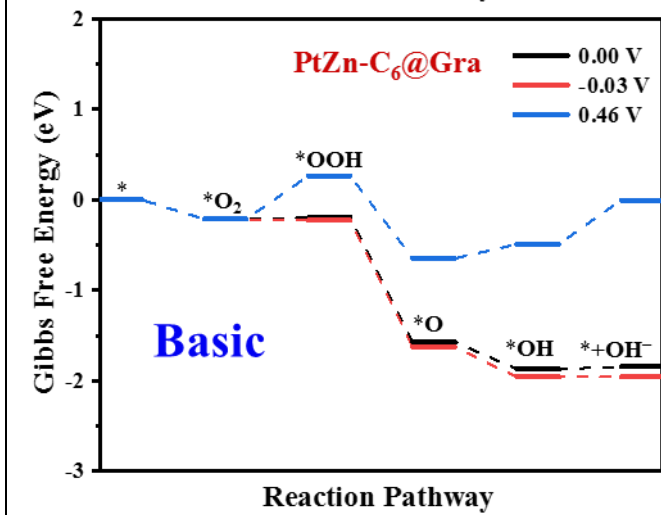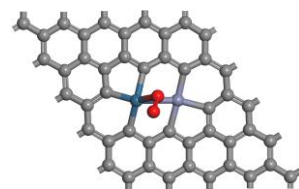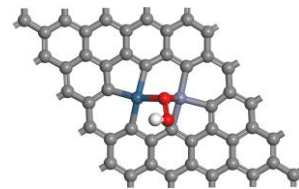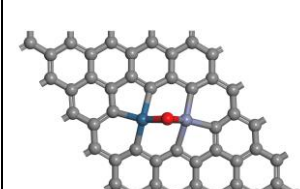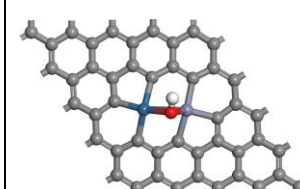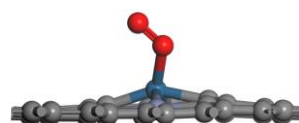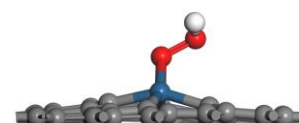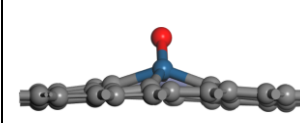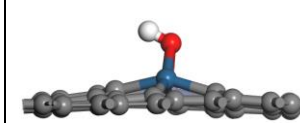

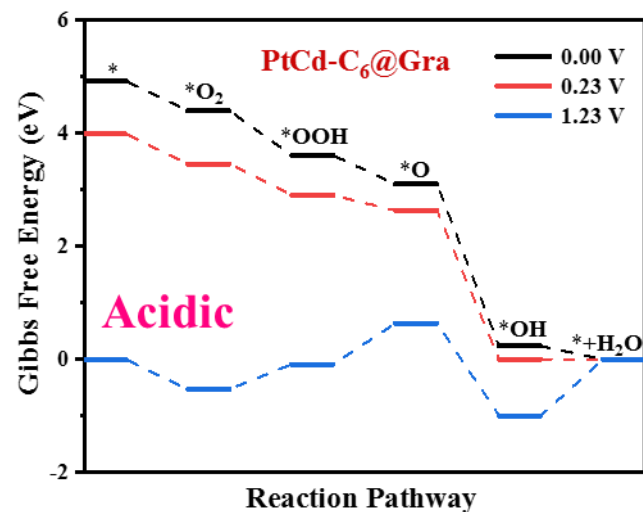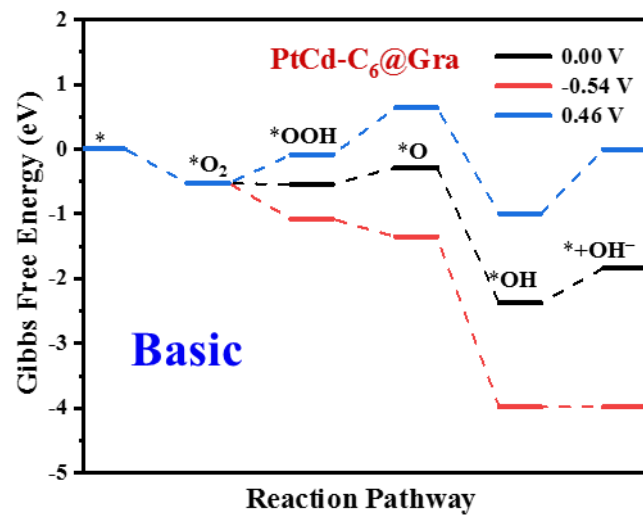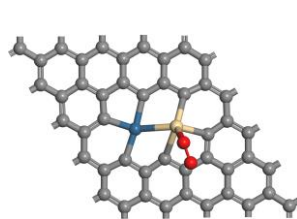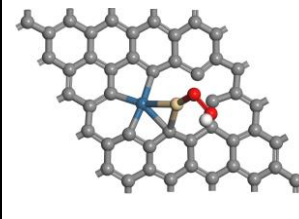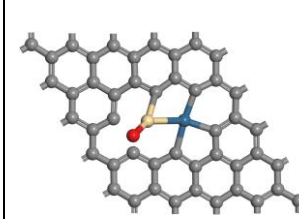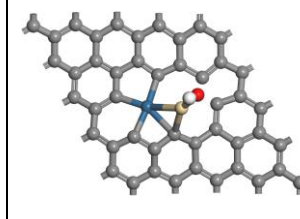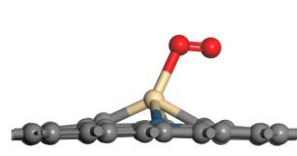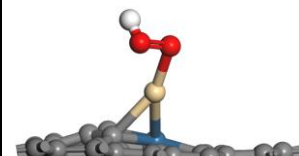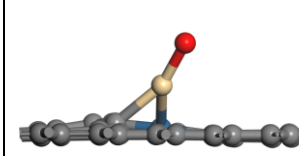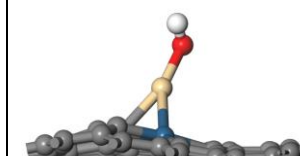



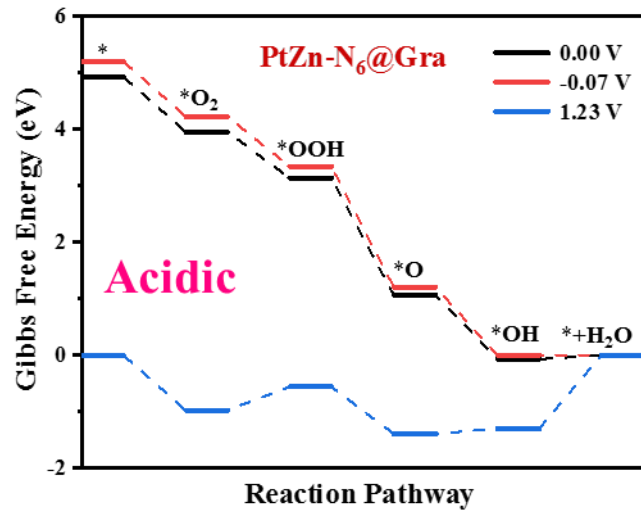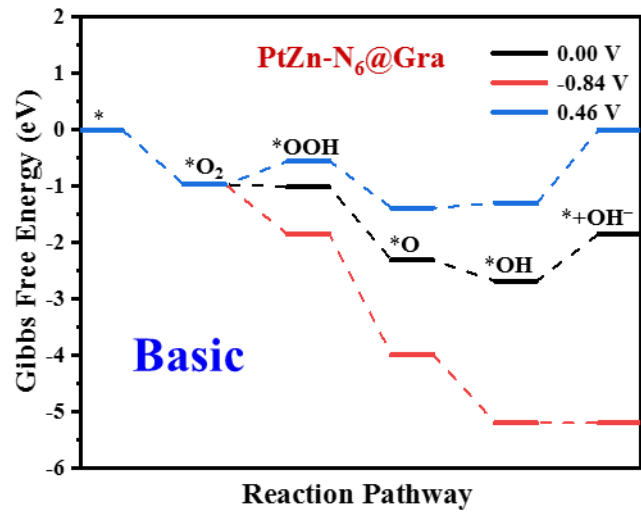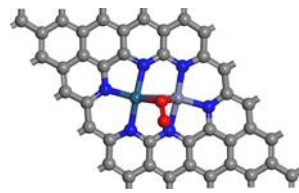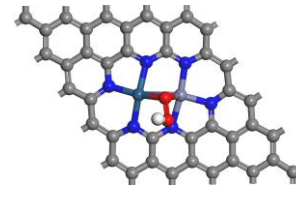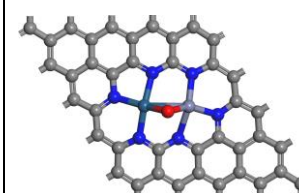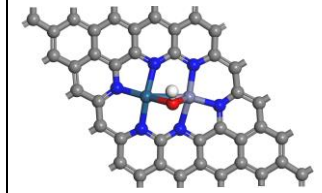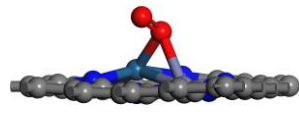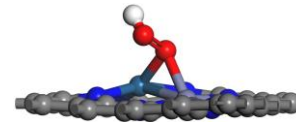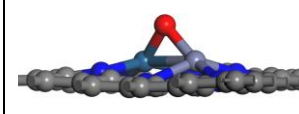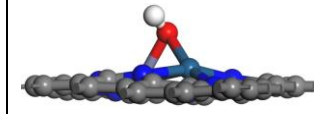

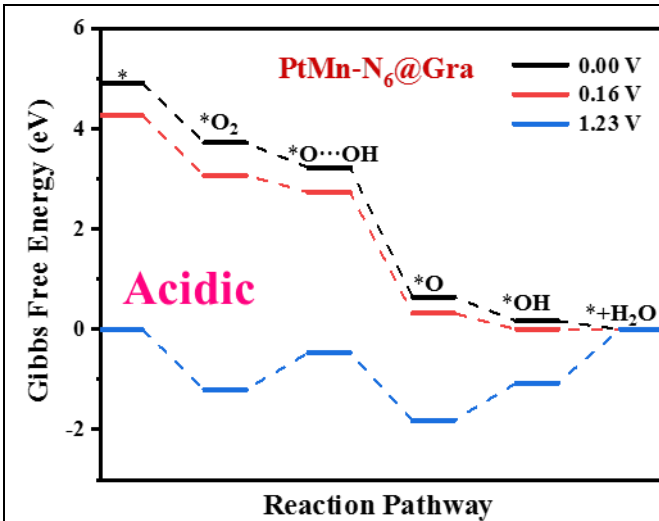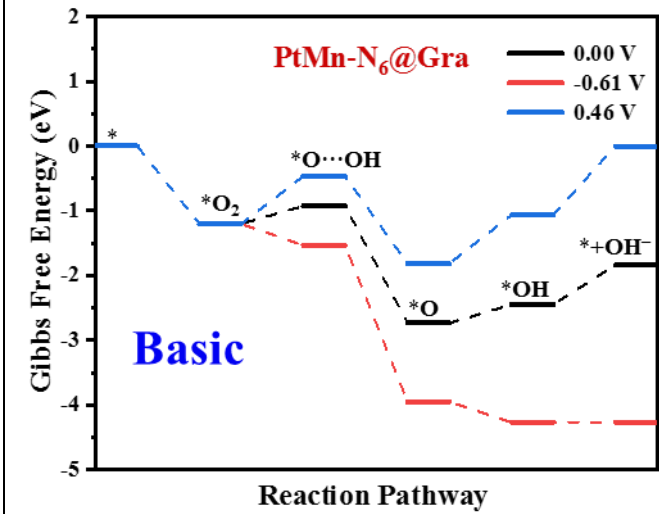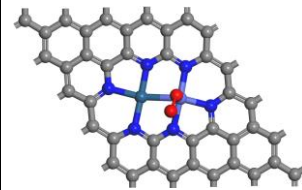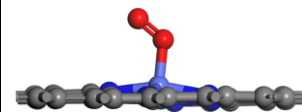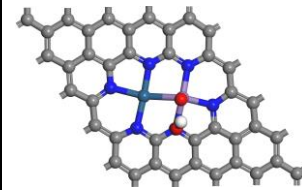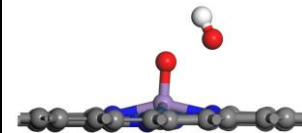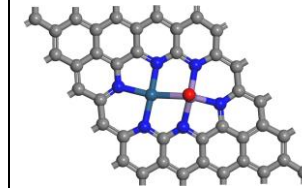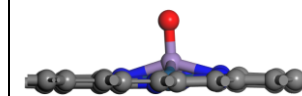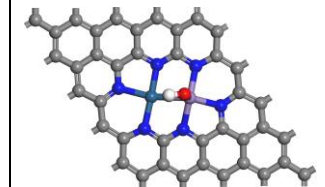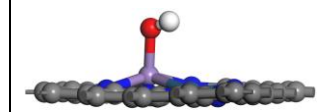

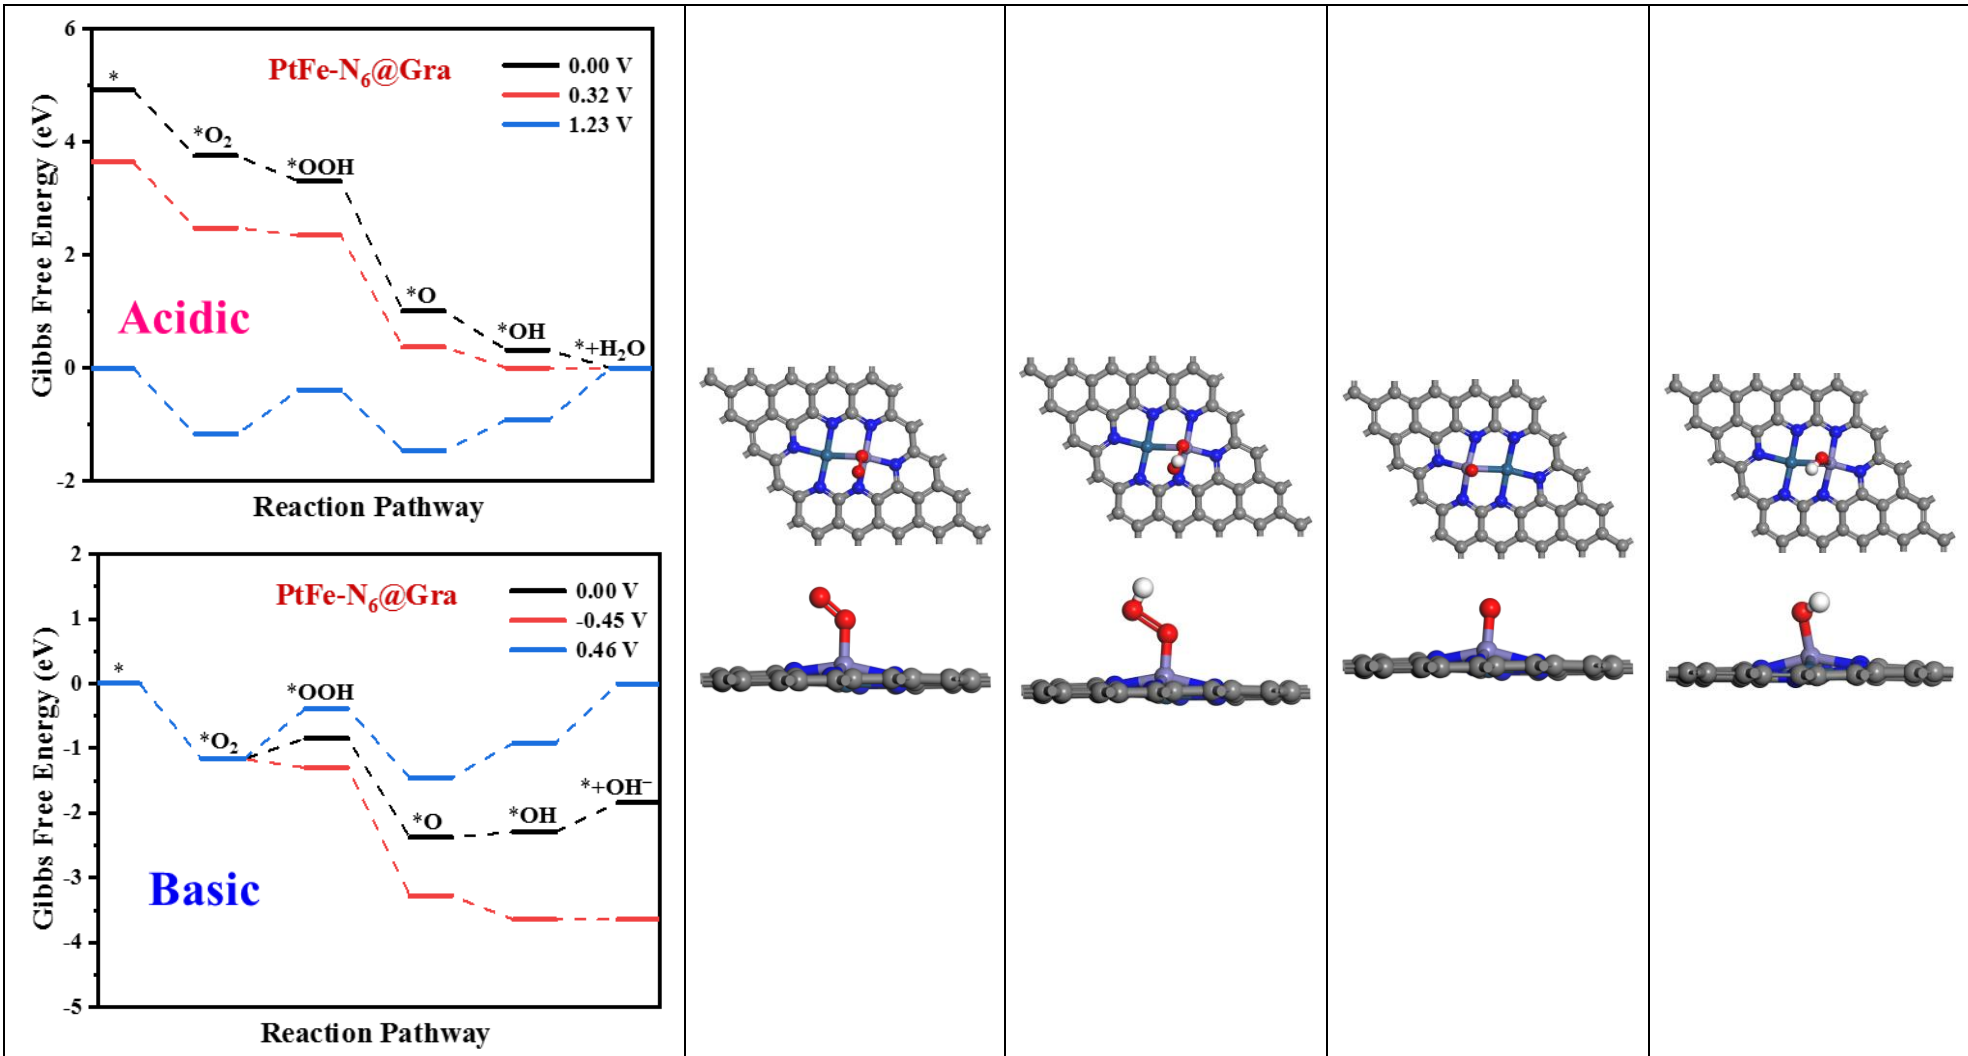

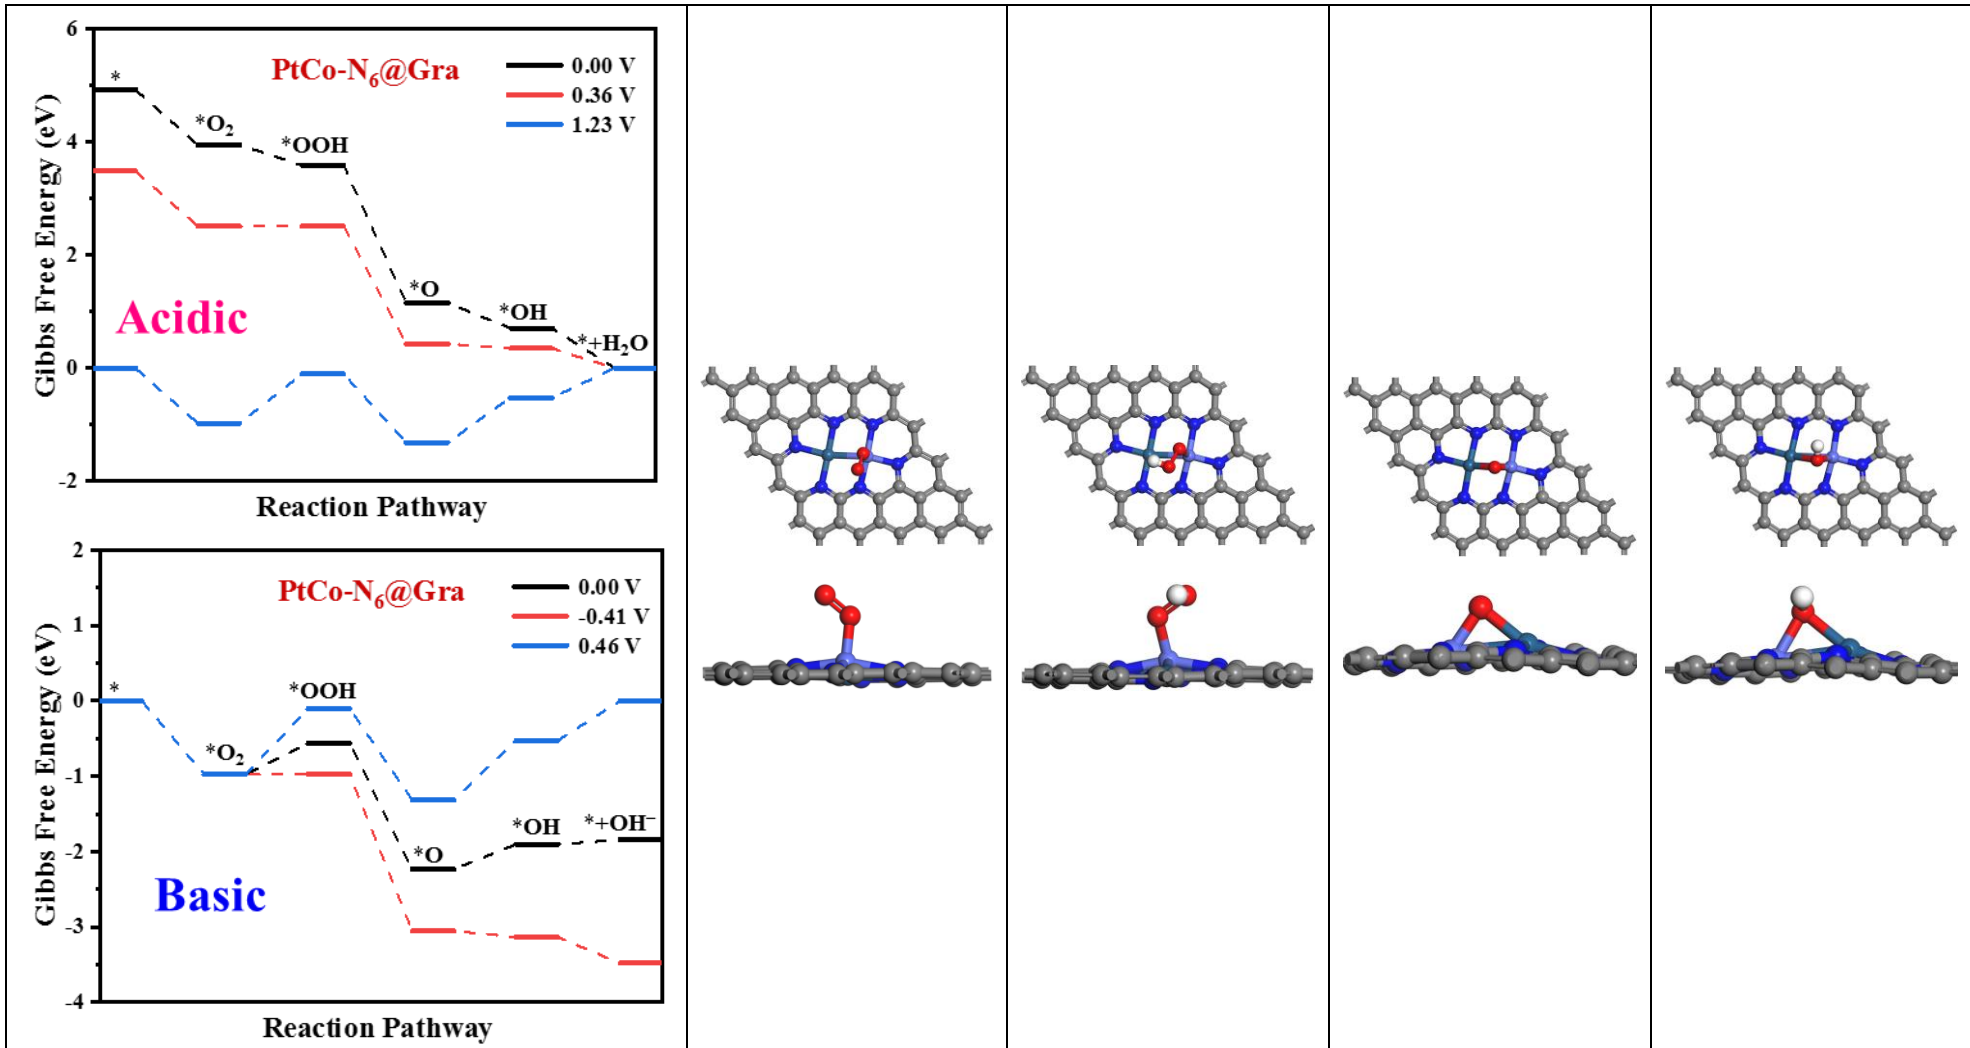

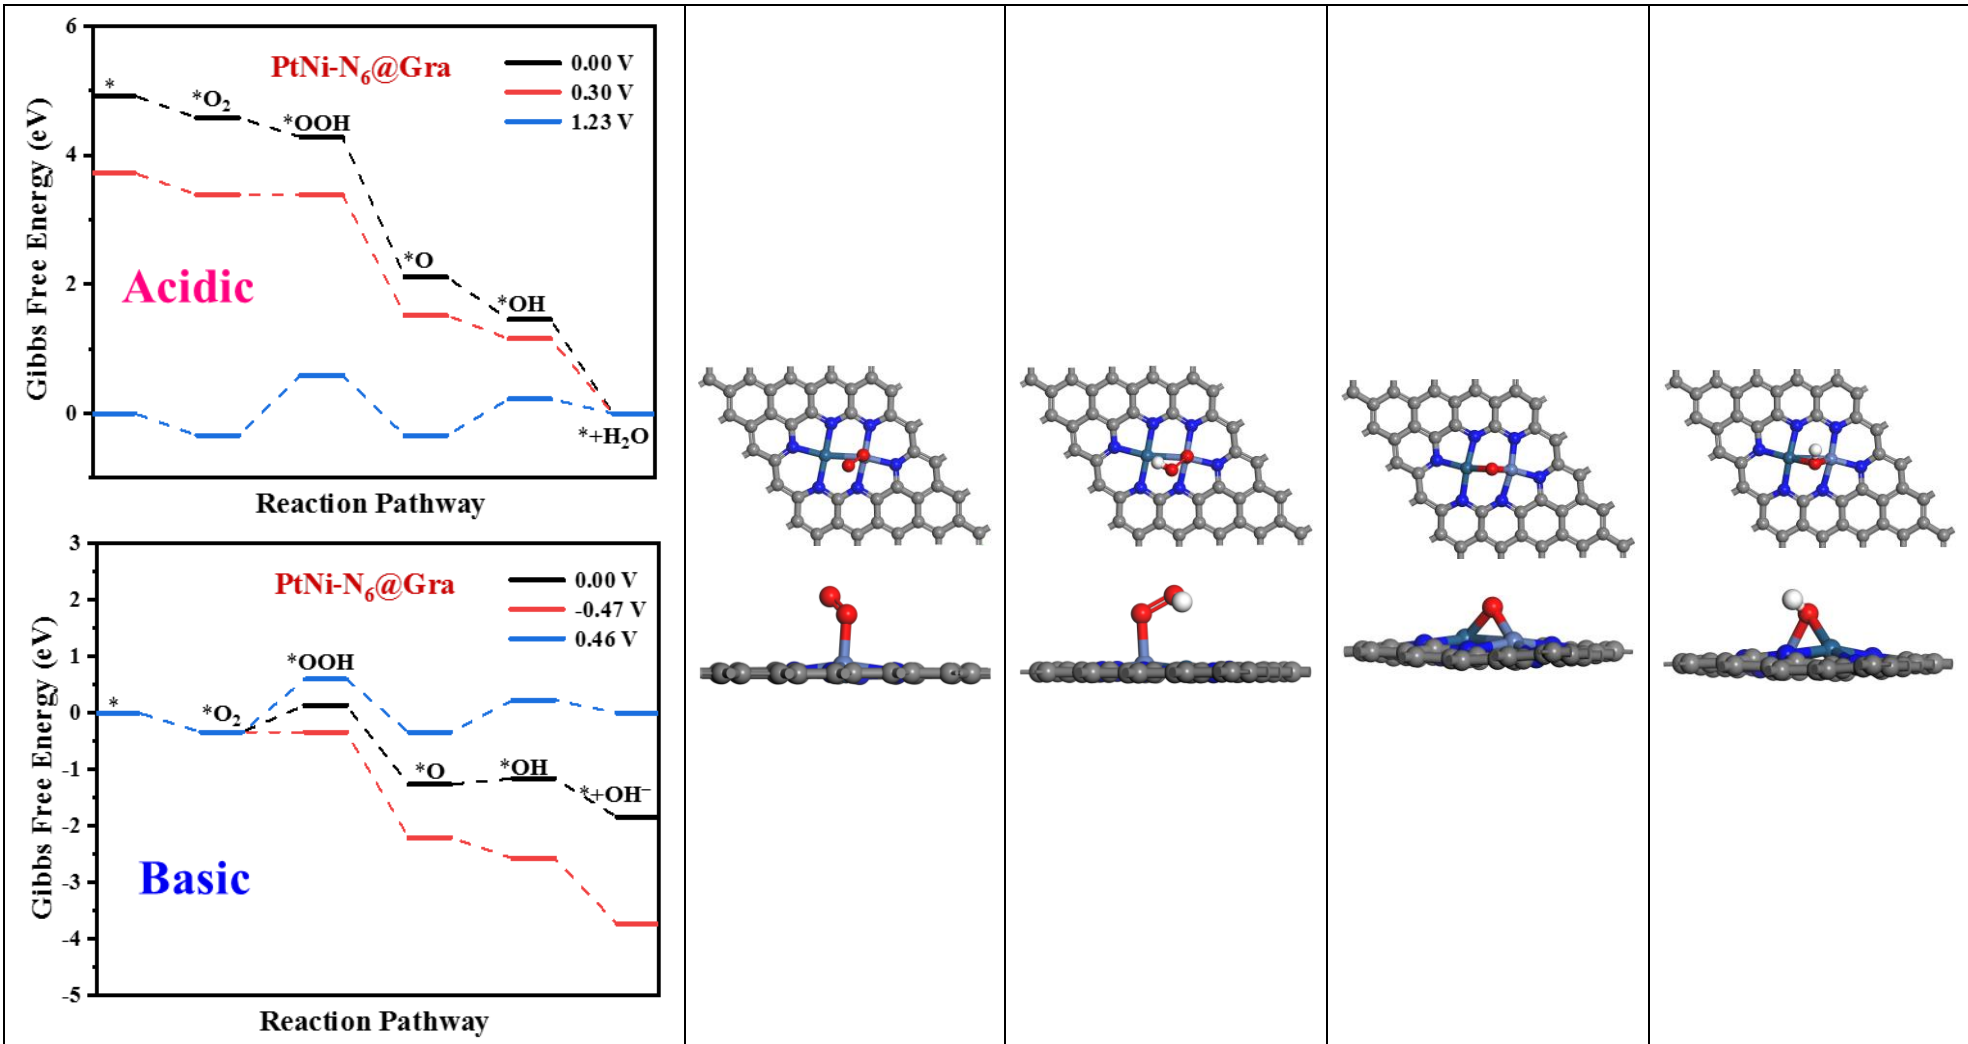

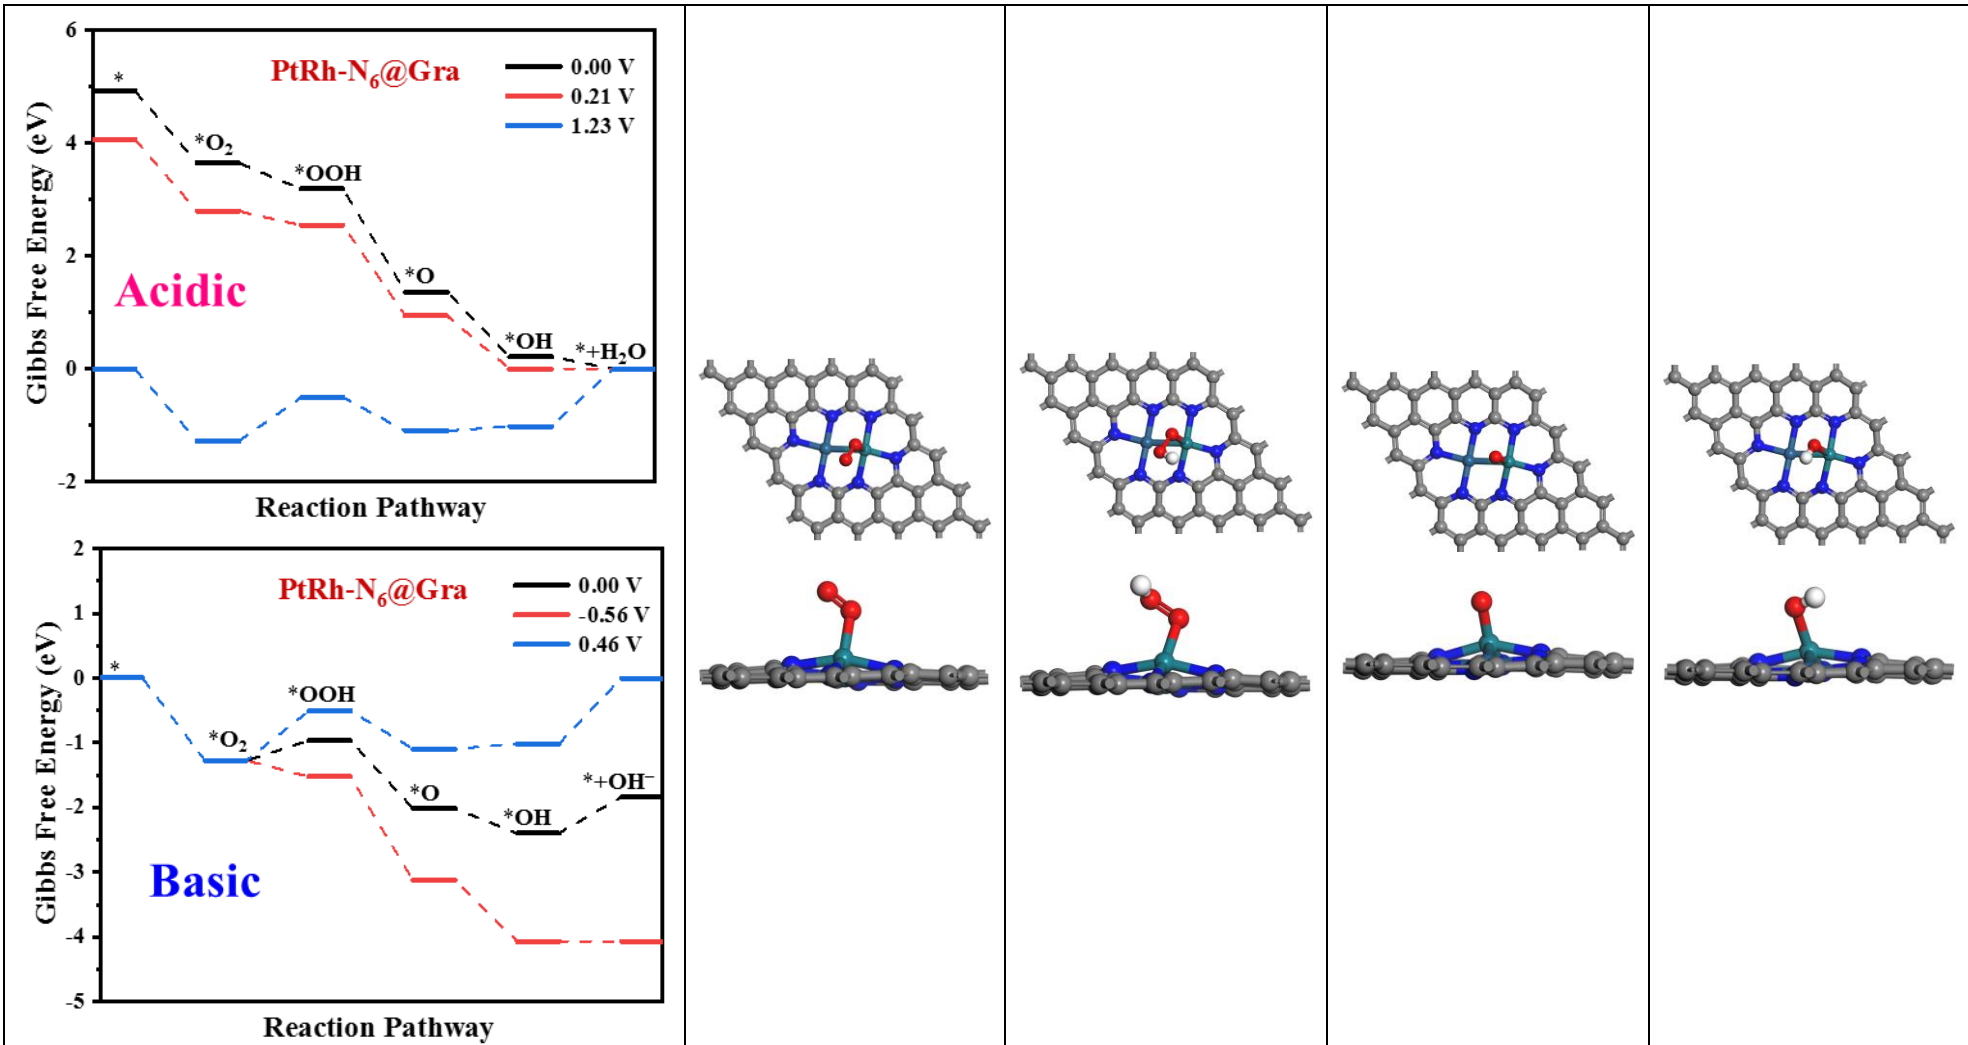

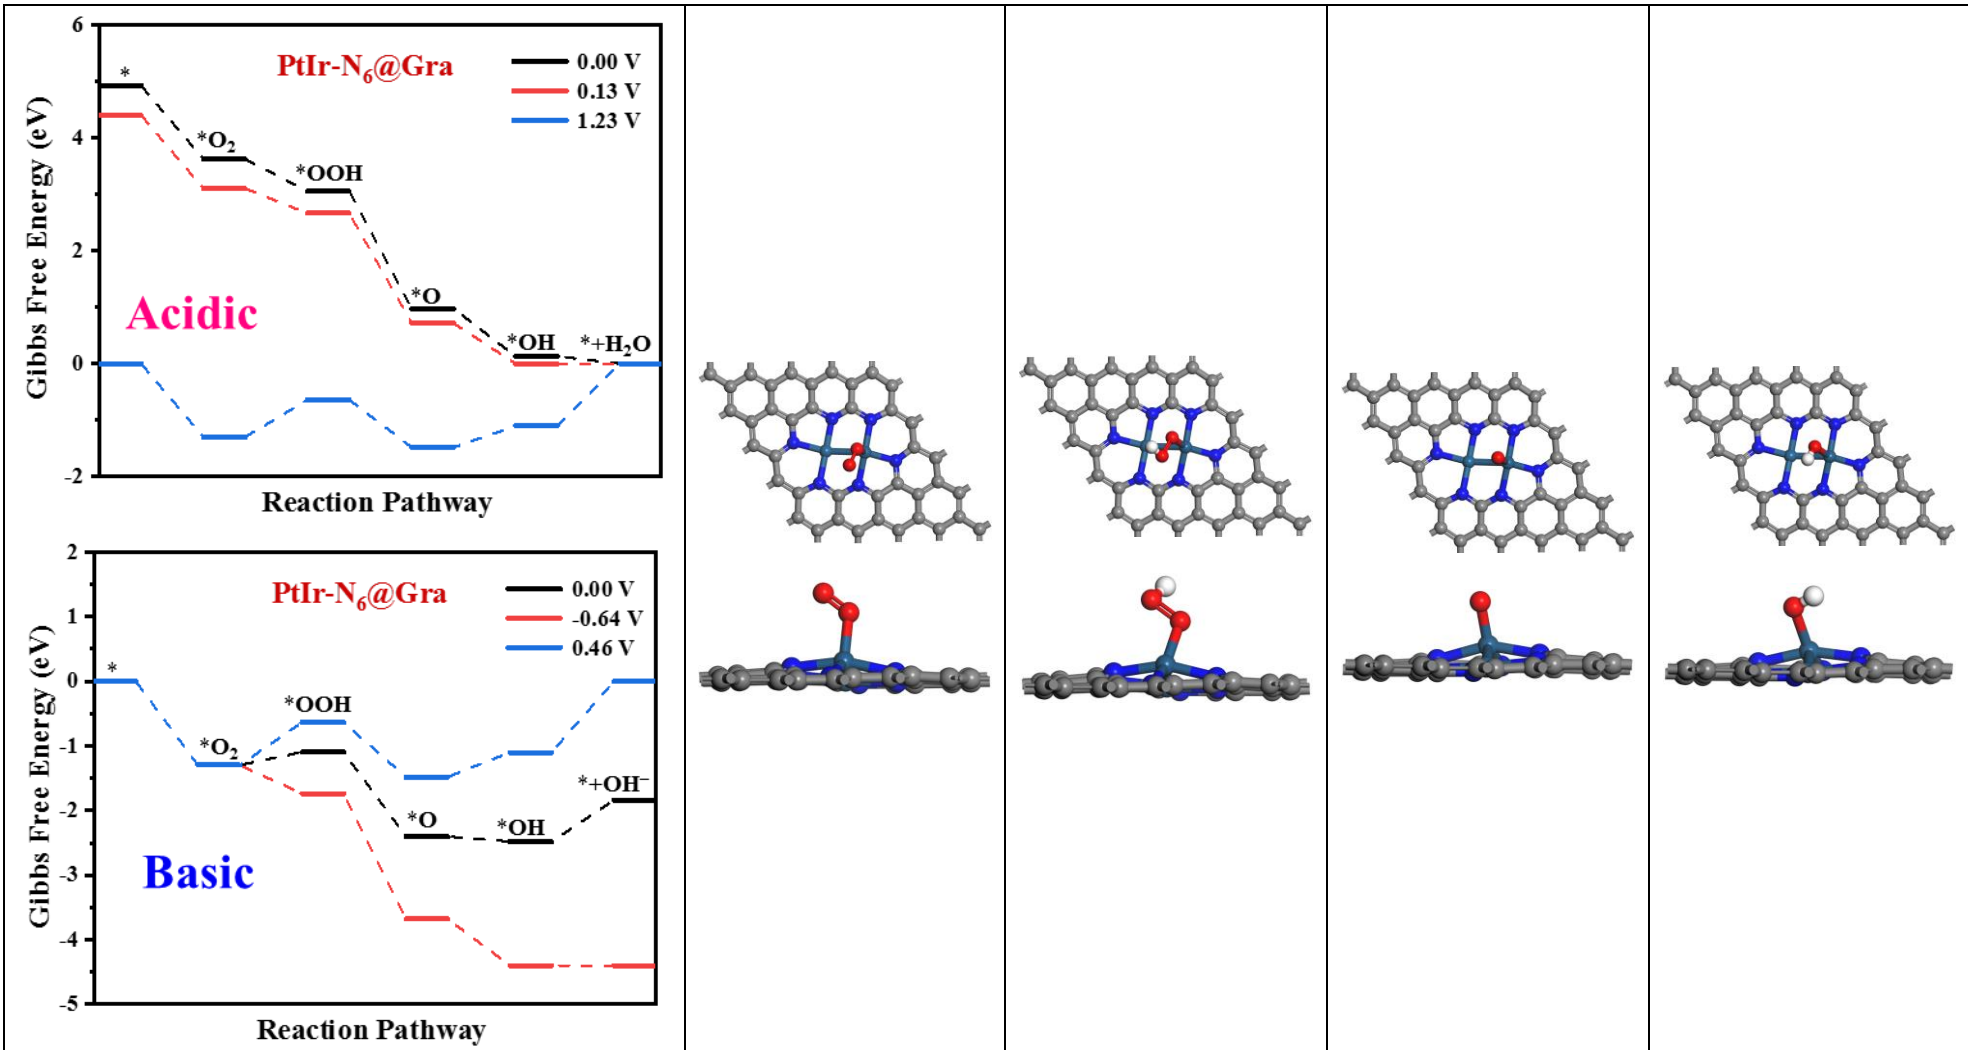



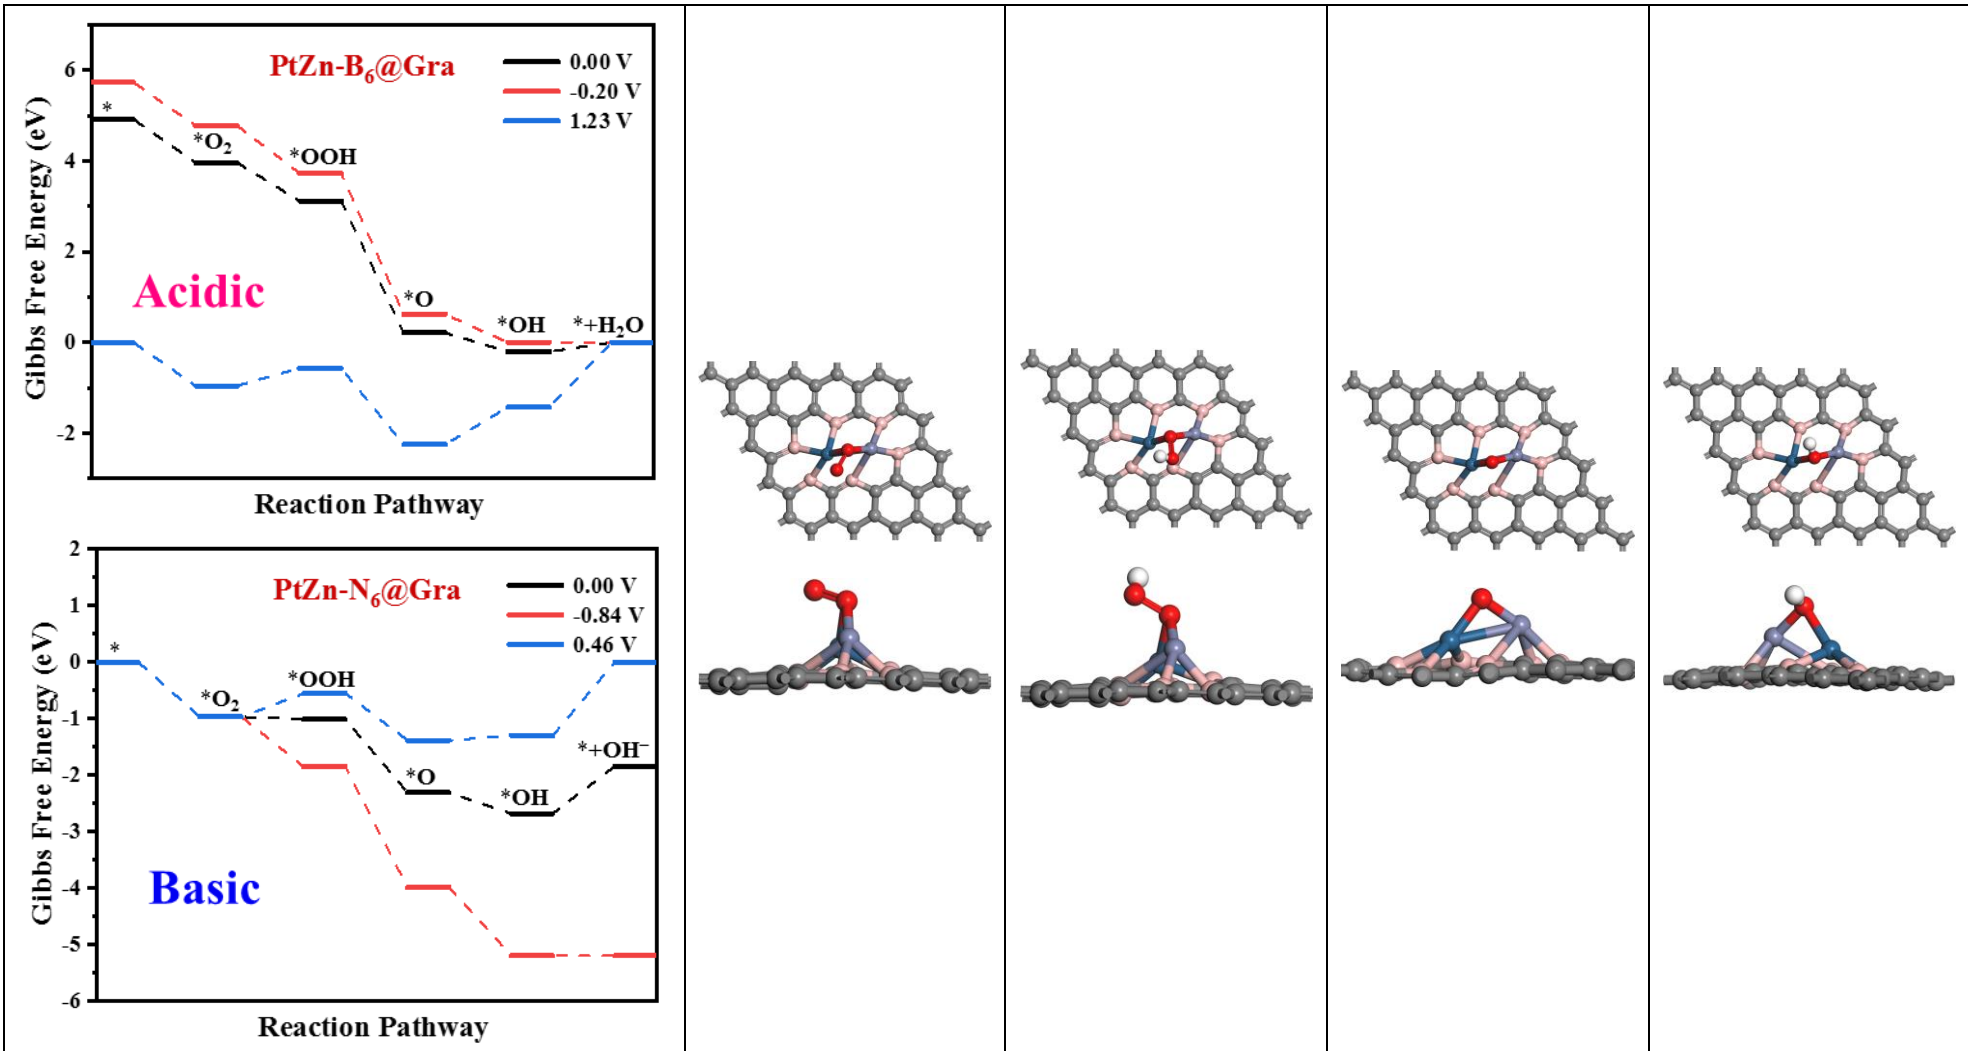

**Table S5.** Summary of the most favorable pathways of PtM-L<sub>6</sub>@Gra catalysts under the acidic condition (pH=0), Gibbs free energy of the corresponding intermediates (eV), overpotentials (V), and potential-determining step (PDS) are listed.

| Acidic                   | $\Delta G_0^a$         | $\Delta G_1^a$          | $\Delta G_2^a$        | $\Delta G_3^a$       | $\Delta G_4^a$         | Overpotential | PDS            |
|--------------------------|------------------------|-------------------------|-----------------------|----------------------|------------------------|---------------|----------------|
| pH = 0                   | $O_2 \rightarrow *O_2$ | $*O_2 \rightarrow *OOH$ | $*OOH \rightarrow *O$ | $*O \rightarrow *OH$ | $*OH \rightarrow H_2O$ |               |                |
| PtCd-C <sub>6</sub> @Gra | -0.53                  | -0.79                   | -0.51                 | -2.86                | -0.23                  | 1.00          | $\Delta G_4^a$ |
| PtCo-C <sub>6</sub> @Gra | -1.24                  | -0.32                   | -2.63                 | -0.33                | -0.40                  | 0.91          | $\Delta G_1^a$ |
| PtFe-C <sub>6</sub> @Gra | -1.27                  | -0.50                   | -2.39                 | -0.63                | -0.13                  | 1.10          | $\Delta G_4^a$ |
| PtIr-C <sub>6</sub> @Gra | -1.36                  | -0.75                   | -2.56                 | -0.49                | 0.23                   | 1.46          | $\Delta G_4^a$ |
| PtMn-C <sub>6</sub> @Gra | -1.38                  | -0.38                   | -2.76                 | -0.42                | 0.03                   | 1.26          | $\Delta G_4^a$ |
| PtRh-C <sub>6</sub> @Gra | -1.50                  | -0.67                   | -1.93                 | -0.93                | 0.12                   | 1.35          | $\Delta G_4^a$ |
| PtRu-C <sub>6</sub> @Gra | -2.52                  | -0.61                   | -2.79                 | -0.21                | 1.21                   | 2.44          | $\Delta G_4^a$ |
| PtZn-C <sub>6</sub> @Gra | -0.21                  | -0.75                   | -2.14                 | -1.07                | -0.74                  | 0.49          | $\Delta G_4^a$ |
| PtNi-C <sub>6</sub> @Gra | -0.29                  | -0.37                   | -2.61                 | -0.82                | -0.83                  | 0.86          | $\Delta G_1^a$ |
| PtCd-N <sub>6</sub> @Gra | -1.59                  | -0.68                   | -0.97                 | -2.30                | 0.63                   | 1.86          | $\Delta G_4^a$ |
| PtCo-N <sub>6</sub> @Gra | -0.98                  | -0.36                   | -2.44                 | -0.44                | -0.71                  | 0.87          | $\Delta G_1^a$ |
| PtFe-N <sub>6</sub> @Gra | -1.17                  | -0.45                   | -2.30                 | -0.69                | -0.32                  | 0.91          | $\Delta G_4^a$ |
| PtIr-N <sub>6</sub> @Gra | -1.30                  | -0.57                   | -2.07                 | -0.85                | -0.13                  | 1.10          | $\Delta G_4^a$ |
| PtMn-N <sub>6</sub> @Gra | -1.20                  | -0.49                   | -2.58                 | -0.48                | -0.16                  | 1.07          | $\Delta G_4^a$ |
| PtNi-N <sub>6</sub> @Gra | -0.34                  | -0.30                   | -1.27                 | -0.66                | -1.45                  | 0.93          | $\Delta G_1^a$ |
| PtOs-N <sub>6</sub> @Gra | -2.26                  | -1.13                   | -2.63                 | 0.28                 | 0.82                   | 2.05          | $\Delta G_4^a$ |
| PtRh-N <sub>6</sub> @Gra | -1.27                  | -0.46                   | -1.82                 | -1.15                | -0.21                  | 1.02          | $\Delta G_4^a$ |
| PtRu-N <sub>6</sub> @Gra | -2.58                  | -0.08                   | -2.41                 | -0.17                | 1.04                   | 2.27          | $\Delta G_4^a$ |
| PtZn-N <sub>6</sub> @Gra | -0.97                  | -0.81                   | -2.06                 | -1.14                | 0.07                   | 1.30          | $\Delta G_4^a$ |
| PtCd-B <sub>6</sub> @Gra | -2.60                  | -0.17                   | -3.02                 | -0.23                | 1.10                   | 2.33          | $\Delta G_4^a$ |
| PtNi-B <sub>6</sub> @Gra | -2.40                  | -0.28                   | -2.36                 | -1.09                | 1.20                   | 2.44          | $\Delta G_4^a$ |
| PtZn-B <sub>6</sub> @Gra | -0.96                  | -0.85                   | -2.91                 | -0.41                | 0.20                   | 1.43          | $\Delta G_4^a$ |

**Table S6.** Summary of the most favorable pathways of PtM-L<sub>6</sub>@Gra catalysts under the basic condition (pH=13), Gibbs free energy of the corresponding intermediates (eV), overpotentials (V), and PDS are listed.

| Basic                    | $\Delta G_0^b$         | $\Delta G_1^b$          | $\Delta G_2^b$        | $\Delta G_3^b$       | $\Delta G_4^b$         | Overpotential | PDS            |
|--------------------------|------------------------|-------------------------|-----------------------|----------------------|------------------------|---------------|----------------|
| pH = 13                  | $O_2 \rightarrow *O_2$ | $*O_2 \rightarrow *OOH$ | $*OOH \rightarrow *O$ | $*O \rightarrow *OH$ | $*OH \rightarrow OH^-$ |               |                |
| PtCd-C <sub>6</sub> @Gra | -0.53                  | -0.02                   | 0.26                  | -2.09                | 0.54                   | 1.00          | $\Delta G_4^b$ |
| PtCo-C <sub>6</sub> @Gra | -1.24                  | 0.45                    | -1.86                 | 0.44                 | 0.37                   | 0.91          | $\Delta G_1^b$ |
| PtFe-C <sub>6</sub> @Gra | -1.27                  | 0.27                    | -1.62                 | 0.14                 | 0.64                   | 1.10          | $\Delta G_4^b$ |
| PtIr-C <sub>6</sub> @Gra | -1.36                  | 0.02                    | -1.79                 | 0.28                 | 1.00                   | 1.46          | $\Delta G_4^b$ |
| PtMn-C <sub>6</sub> @Gra | -1.38                  | 0.39                    | -1.99                 | 0.35                 | 0.80                   | 1.26          | $\Delta G_4^b$ |
| PtRh-C <sub>6</sub> @Gra | -1.50                  | 0.10                    | -1.16                 | -0.16                | 0.89                   | 1.35          | $\Delta G_4^b$ |
| PtRu-C <sub>6</sub> @Gra | -2.52                  | 0.16                    | -2.02                 | 0.56                 | 1.98                   | 2.44          | $\Delta G_4^b$ |
| PtZn-C <sub>6</sub> @Gra | -0.21                  | 0.02                    | -1.37                 | -0.30                | 0.03                   | 0.49          | $\Delta G_4^b$ |
| PtNi-C <sub>6</sub> @Gra | -0.29                  | 0.40                    | -1.84                 | -0.05                | -0.06                  | 0.86          | $\Delta G_1^b$ |
| PtCd-N <sub>6</sub> @Gra | -1.59                  | 0.09                    | -0.20                 | -1.53                | 1.40                   | 1.86          | $\Delta G_4^b$ |
| PtCo-N <sub>6</sub> @Gra | -0.98                  | 0.41                    | -1.67                 | 0.33                 | 0.06                   | 0.87          | $\Delta G_1^b$ |
| PtFe-N <sub>6</sub> @Gra | -1.17                  | 0.32                    | -1.53                 | 0.08                 | 0.45                   | 0.91          | $\Delta G_4^b$ |
| PtIr-N <sub>6</sub> @Gra | -1.30                  | 0.20                    | -1.31                 | -0.08                | 0.64                   | 1.10          | $\Delta G_4^b$ |
| PtMn-N <sub>6</sub> @Gra | -1.20                  | 0.28                    | -1.81                 | 0.29                 | 0.61                   | 1.07          | $\Delta G_4^b$ |
| PtNi-N <sub>6</sub> @Gra | -0.34                  | 0.47                    | -1.40                 | 0.11                 | -0.68                  | 0.93          | $\Delta G_1^b$ |
| PtOs-N <sub>6</sub> @Gra | -2.26                  | -0.36                   | -1.86                 | 1.05                 | 1.59                   | 2.05          | $\Delta G_4^b$ |
| PtRh-N <sub>6</sub> @Gra | -1.27                  | 0.31                    | -1.05                 | -0.38                | 0.56                   | 1.02          | $\Delta G_4^b$ |
| PtRu-N <sub>6</sub> @Gra | -2.58                  | -0.03                   | -1.64                 | 0.60                 | 1.81                   | 2.27          | $\Delta G_4^b$ |
| PtZn-N <sub>6</sub> @Gra | -0.97                  | -0.04                   | -1.29                 | -0.37                | 0.84                   | 1.30          | $\Delta G_4^b$ |
| PtCd-B <sub>6</sub> @Gra | -2.60                  | 0.60                    | -2.25                 | 0.54                 | 1.87                   | 2.33          | $\Delta G_4^b$ |
| PtNi-B <sub>6</sub> @Gra | -2.40                  | 0.49                    | -1.59                 | -0.32                | 1.98                   | 2.44          | $\Delta G_4^b$ |
| PtZn-B <sub>6</sub> @Gra | -0.96                  | -0.08                   | -2.14                 | 0.35                 | 0.97                   | 1.43          | $\Delta G_4^b$ |

**Table S7.** Thermal corrections (eV) of small molecule (H<sub>2</sub>O, H<sub>2</sub>) and the reaction intermediates (O<sub>x</sub>H<sub>y</sub>) along the most favorable pathways on PtM-L<sub>6</sub>@Gra. Thermal corrections of the small molecules (H<sub>2</sub>O, H<sub>2</sub>) can be obtained from the NIST database.

| molecule         | ZPE  | TS   | ∫CpdT |
|------------------|------|------|-------|
| H <sub>2</sub> O | 0.56 | 0.58 | 0.10  |
| H <sub>2</sub>   | 0.27 | 0.40 | 0.09  |

| O <sub>x</sub> H <sub>y</sub> | PtCd-C <sub>6</sub> @Gra |      |       | PtCo-C <sub>6</sub> @Gra |      |       | PtFe-C <sub>6</sub> @Gra |      |       | PtZn-C <sub>6</sub> @Gra |      |       | PtNi-C <sub>6</sub> @Gra |      |       | PtZn-B <sub>6</sub> @Gra |      |       |
|-------------------------------|--------------------------|------|-------|--------------------------|------|-------|--------------------------|------|-------|--------------------------|------|-------|--------------------------|------|-------|--------------------------|------|-------|
|                               | ZPE                      | TS   | ∫CpdT |
| *O <sub>2</sub>               | 0.11                     | 0.24 | 0.10  | 0.14                     | 0.16 | 0.08  | 0.16                     | 0.15 | 0.07  | 0.13                     | 0.19 | 0.09  | 0.12                     | 0.16 | 0.07  | 0.13                     | 0.15 | 0.07  |
| *OOH                          | 0.42                     | 0.24 | 0.11  | 0.45                     | 0.17 | 0.09  | 0.47                     | 0.17 | 0.08  | 0.43                     | 0.20 | 0.10  | 0.43                     | 0.20 | 0.10  | 0.44                     | 0.17 | 0.09  |
| *O                            | 0.04                     | 0.12 | 0.05  | 0.08                     | 0.05 | 0.03  | 0.07                     | 0.07 | 0.04  | 0.07                     | 0.05 | 0.03  | 0.08                     | 0.07 | 0.03  | 0.08                     | 0.05 | 0.03  |
| *OH                           | 0.33                     | 0.15 | 0.07  | 0.37                     | 0.07 | 0.04  | 0.35                     | 0.10 | 0.05  | 0.37                     | 0.07 | 0.04  | 0.37                     | 0.07 | 0.04  | 0.37                     | 0.07 | 0.04  |

| *O <sub>x</sub> H <sub>y</sub> | PtCo-N <sub>6</sub> @Gra |      |       | PtFe-N <sub>6</sub> @Gra |      |       | PtIr-N <sub>6</sub> @Gra |      |       | PtMn-N <sub>6</sub> @Gra |      |       | PtNi-N <sub>6</sub> @Gra |      |       | PtRh-N <sub>6</sub> @Gra |      |       |
|--------------------------------|--------------------------|------|-------|--------------------------|------|-------|--------------------------|------|-------|--------------------------|------|-------|--------------------------|------|-------|--------------------------|------|-------|
|                                | ZPE                      | TS   | ∫CpdT |
| *O <sub>2</sub>                | 0.15                     | 0.16 | 0.08  | 0.15                     | 0.15 | 0.07  | 0.15                     | 0.16 | 0.08  | 0.13                     | 0.19 | 0.09  | 0.12                     | 0.20 | 0.09  | 0.14                     | 0.18 | 0.08  |
| *OOH                           | 0.45                     | 0.17 | 0.09  | 0.47                     | 0.17 | 0.08  | 0.45                     | 0.19 | 0.09  | 0.38                     | 0.23 | 0.11  | 0.43                     | 0.20 | 0.10  | 0.45                     | 0.18 | 0.09  |
| *O                             | 0.09                     | 0.04 | 0.02  | 0.07                     | 0.07 | 0.04  | 0.07                     | 0.07 | 0.04  | 0.08                     | 0.06 | 0.03  | 0.09                     | 0.03 | 0.02  | 0.06                     | 0.07 | 0.04  |
| *OH                            | 0.39                     | 0.05 | 0.03  | 0.35                     | 0.10 | 0.05  | 0.36                     | 0.09 | 0.05  | 0.33                     | 0.12 | 0.06  | 0.38                     | 0.07 | 0.04  | 0.35                     | 0.10 | 0.05  |

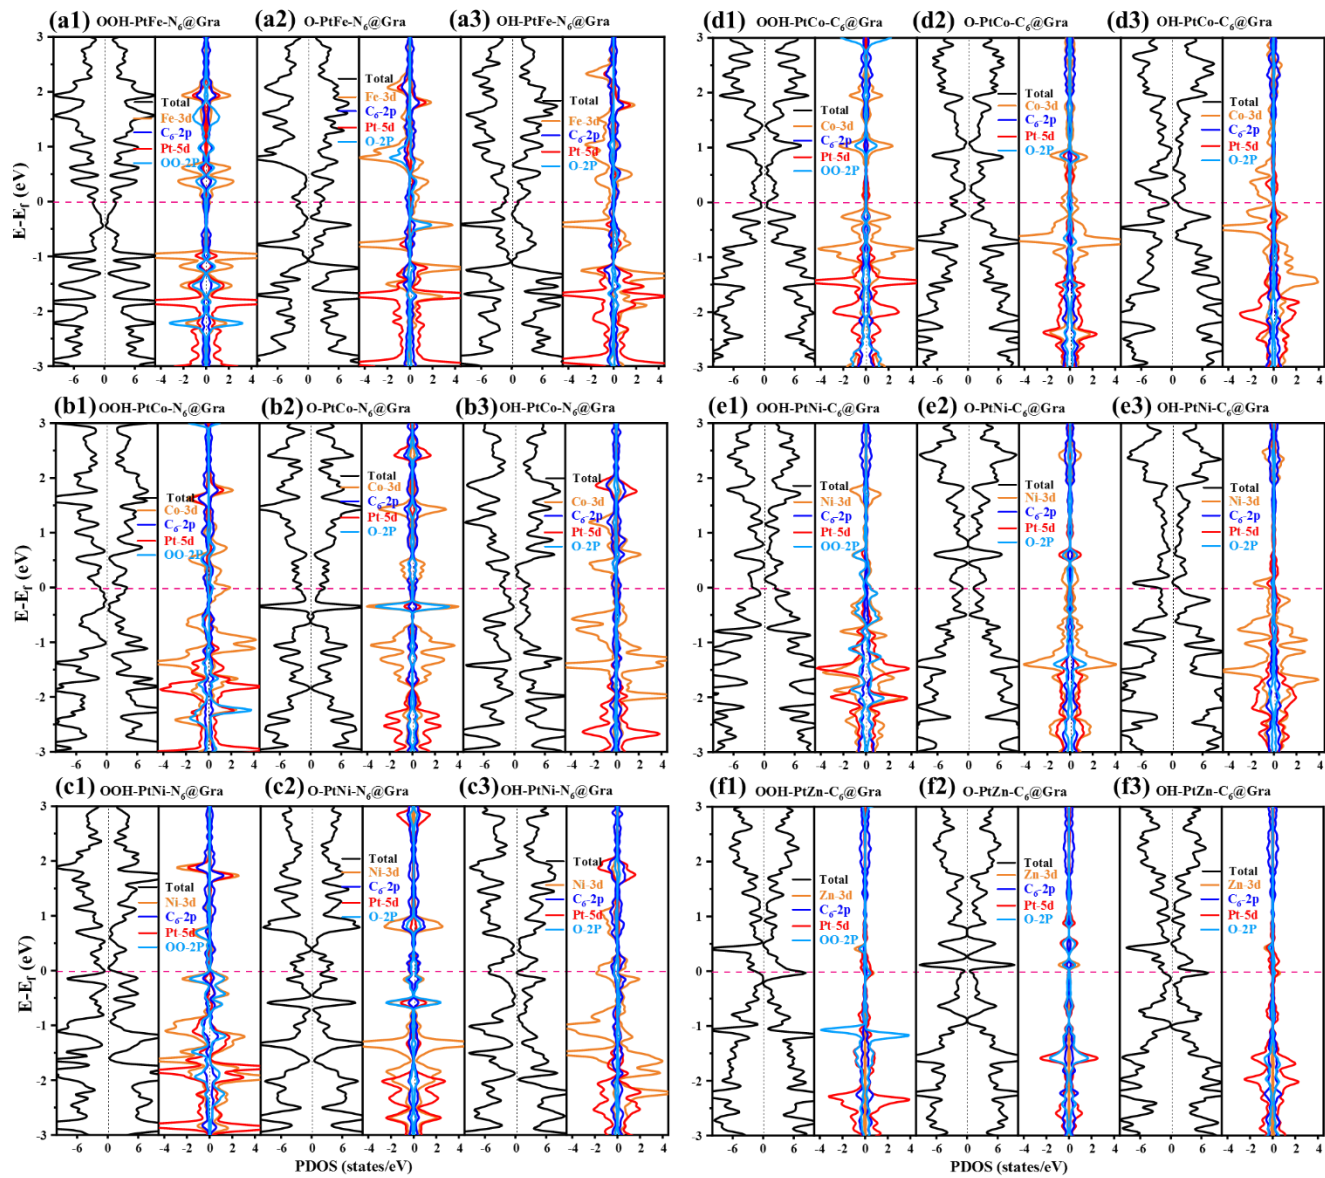

**Figure S3.** Calculated PDOS of various intermediates (\*OOH, \*O, \*OH) adsorption on the active site of (a1-a3) PtFe-N<sub>6</sub>@Gra, (b1-b3) PtCo-N<sub>6</sub>@Gra, (c1-c3) PtNi-N<sub>6</sub>@Gra, (d1-d3) PtCo-C<sub>6</sub>@Gra, (e1-e3) PtNi-C<sub>6</sub>@Gra, (f1-f3) PtZn-C<sub>6</sub>@Gra.



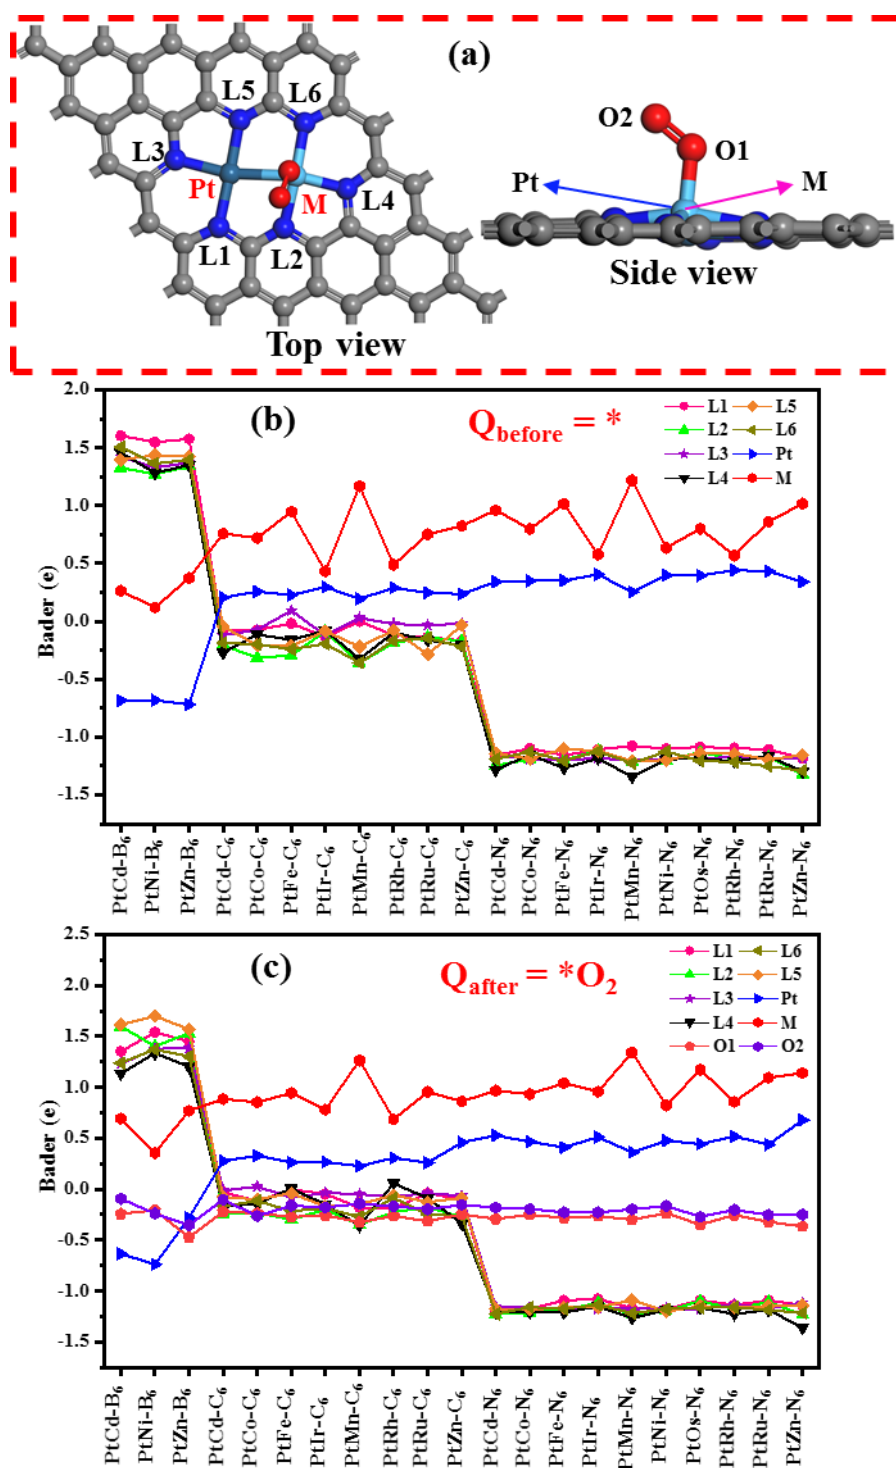

**Figure S4.** Schematic diagram of (a) the definition of the six coordination atoms connected to Pt and M (L1-L6), and adsorbed O<sub>2</sub>. O1 represents that O is close to the metal, O2 represents that O is far away from the metal, respectively. The Bader charge diagrams of each part (i.e., L1-L6, Pt, M, O1, O2) of the 21 catalysts (b) before and (c) after O<sub>2</sub> adsorption.



**Table S9.** Bader charge of each part of 21 catalysts before adsorbing O<sub>2</sub>, the labels of different atoms following Figure S4a.

| PtM-L <sub>6</sub> @Gra  | L1    | L2    | L3    | L4    | L5    | L6    | Pt    | M    |
|--------------------------|-------|-------|-------|-------|-------|-------|-------|------|
| PtCd-B <sub>6</sub> @Gra | 1.60  | 1.33  | 1.42  | 1.46  | 1.40  | 1.51  | -0.68 | 0.26 |
| PtNi-B <sub>6</sub> @Gra | 1.55  | 1.27  | 1.33  | 1.28  | 1.44  | 1.36  | -0.68 | 0.12 |
| PtZn-B <sub>6</sub> @Gra | 1.58  | 1.34  | 1.37  | 1.35  | 1.43  | 1.39  | -0.72 | 0.37 |
| PtCd-C <sub>6</sub> @Gra | -0.08 | -0.21 | -0.12 | -0.27 | -0.05 | -0.19 | 0.21  | 0.76 |
| PtCo-C <sub>6</sub> @Gra | -0.08 | -0.32 | -0.07 | -0.11 | -0.21 | -0.20 | 0.26  | 0.72 |
| PtFe-C <sub>6</sub> @Gra | -0.02 | -0.29 | 0.09  | -0.16 | -0.21 | -0.24 | 0.23  | 0.95 |
| PtIr-C <sub>6</sub> @Gra | -0.14 | -0.09 | -0.12 | -0.08 | -0.08 | -0.19 | 0.30  | 0.43 |
| PtMn-C <sub>6</sub> @Gra | 0.00  | -0.36 | 0.03  | -0.33 | -0.22 | -0.36 | 0.19  | 1.17 |
| PtRh-C <sub>6</sub> @Gra | -0.12 | -0.19 | -0.02 | -0.10 | -0.08 | -0.17 | 0.29  | 0.49 |
| PtRu-C <sub>6</sub> @Gra | -0.14 | -0.14 | -0.03 | -0.16 | -0.29 | -0.15 | 0.25  | 0.75 |
| PtZn-C <sub>6</sub> @Gra | -0.17 | -0.17 | -0.02 | -0.21 | -0.03 | -0.22 | 0.24  | 0.82 |
| PtCd-N <sub>6</sub> @Gra | -1.16 | -1.24 | -1.15 | -1.28 | -1.14 | -1.19 | 0.34  | 0.96 |
| PtCo-N <sub>6</sub> @Gra | -1.10 | -1.19 | -1.19 | -1.15 | -1.19 | -1.13 | 0.35  | 0.80 |
| PtFe-N <sub>6</sub> @Gra | -1.16 | -1.20 | -1.20 | -1.27 | -1.10 | -1.21 | 0.35  | 1.02 |
| PtIr-N <sub>6</sub> @Gra | -1.11 | -1.12 | -1.18 | -1.19 | -1.12 | -1.12 | 0.41  | 0.58 |
| PtMn-N <sub>6</sub> @Gra | -1.08 | -1.21 | -1.20 | -1.34 | -1.21 | -1.23 | 0.25  | 1.22 |
| PtNi-N <sub>6</sub> @Gra | -1.10 | -1.20 | -1.19 | -1.19 | -1.20 | -1.12 | 0.40  | 0.64 |
| PtOs-N <sub>6</sub> @Gra | -1.09 | -1.13 | -1.19 | -1.18 | -1.14 | -1.21 | 0.40  | 0.80 |
| PtRh-N <sub>6</sub> @Gra | -1.10 | -1.19 | -1.17 | -1.21 | -1.14 | -1.22 | 0.44  | 0.57 |
| PtRu-N <sub>6</sub> @Gra | -1.11 | -1.17 | -1.18 | -1.16 | -1.20 | -1.25 | 0.43  | 0.86 |
| PtZn-N <sub>6</sub> @Gra | -1.19 | -1.32 | -1.19 | -1.30 | -1.16 | -1.29 | 0.34  | 1.02 |

**Table S10.** Bader charge of each part of 21 catalysts after adsorbing O<sub>2</sub>, the labels of different atoms following Figure S4a.

| PtM-L <sub>6</sub> @Gra  | L1    | L2    | L3    | L4    | L5    | L6    | Pt    | M    | O1    | O2    |
|--------------------------|-------|-------|-------|-------|-------|-------|-------|------|-------|-------|
| PtCd-B <sub>6</sub> @Gra | 1.35  | 1.60  | 1.23  | 1.14  | 1.62  | 1.24  | -0.63 | 0.69 | -0.24 | -0.09 |
| PtNi-B <sub>6</sub> @Gra | 1.54  | 1.40  | 1.38  | 1.33  | 1.70  | 1.37  | -0.74 | 0.36 | -0.21 | -0.24 |
| PtZn-B <sub>6</sub> @Gra | 1.45  | 1.53  | 1.38  | 1.20  | 1.57  | 1.30  | -0.28 | 0.77 | -0.47 | -0.35 |
| PtCd-C <sub>6</sub> @Gra | -0.03 | -0.25 | -0.01 | -0.17 | -0.08 | -0.17 | 0.28  | 0.89 | -0.22 | -0.10 |
| PtCo-C <sub>6</sub> @Gra | -0.12 | -0.23 | 0.03  | -0.14 | -0.10 | -0.12 | 0.33  | 0.85 | -0.24 | -0.26 |
| PtFe-C <sub>6</sub> @Gra | 0.00  | -0.30 | -0.08 | 0.01  | -0.04 | -0.21 | 0.26  | 0.94 | -0.27 | -0.16 |
| PtIr-C <sub>6</sub> @Gra | -0.05 | -0.20 | -0.04 | -0.15 | -0.17 | -0.19 | 0.27  | 0.78 | -0.26 | -0.18 |
| PtMn-C <sub>6</sub> @Gra | -0.18 | -0.35 | -0.05 | -0.36 | -0.15 | -0.27 | 0.23  | 1.27 | -0.32 | -0.14 |
| PtRh-C <sub>6</sub> @Gra | -0.19 | -0.23 | -0.07 | 0.06  | -0.06 | -0.09 | 0.31  | 0.69 | -0.26 | -0.17 |
| PtRu-C <sub>6</sub> @Gra | -0.04 | -0.18 | -0.04 | -0.09 | -0.13 | -0.25 | 0.26  | 0.96 | -0.31 | -0.20 |
| PtZn-C <sub>6</sub> @Gra | -0.10 | -0.27 | -0.06 | -0.34 | -0.08 | -0.26 | 0.46  | 0.86 | -0.25 | -0.15 |
| PtCd-N <sub>6</sub> @Gra | -1.20 | -1.23 | -1.15 | -1.20 | -1.17 | -1.23 | 0.53  | 0.97 | -0.29 | -0.18 |
| PtCo-N <sub>6</sub> @Gra | -1.17 | -1.21 | -1.16 | -1.21 | -1.18 | -1.16 | 0.47  | 0.93 | -0.25 | -0.19 |
| PtFe-N <sub>6</sub> @Gra | -1.09 | -1.18 | -1.16 | -1.21 | -1.16 | -1.17 | 0.41  | 1.04 | -0.28 | -0.23 |
| PtIr-N <sub>6</sub> @Gra | -1.08 | -1.12 | -1.17 | -1.15 | -1.16 | -1.13 | 0.51  | 0.96 | -0.26 | -0.23 |
| PtMn-N <sub>6</sub> @Gra | -1.17 | -1.23 | -1.18 | -1.27 | -1.09 | -1.22 | 0.36  | 1.34 | -0.30 | -0.20 |
| PtNi-N <sub>6</sub> @Gra | -1.18 | -1.20 | -1.17 | -1.19 | -1.20 | -1.18 | 0.48  | 0.82 | -0.24 | -0.16 |
| PtOs-N <sub>6</sub> @Gra | -1.09 | -1.10 | -1.18 | -1.16 | -1.15 | -1.16 | 0.44  | 1.17 | -0.35 | -0.27 |
| PtRh-N <sub>6</sub> @Gra | -1.14 | -1.18 | -1.13 | -1.23 | -1.16 | -1.16 | 0.52  | 0.86 | -0.25 | -0.20 |
| PtRu-N <sub>6</sub> @Gra | -1.09 | -1.11 | -1.17 | -1.18 | -1.15 | -1.19 | 0.44  | 1.09 | -0.32 | -0.25 |
| PtZn-N <sub>6</sub> @Gra | -1.14 | -1.23 | -1.11 | -1.36 | -1.14 | -1.22 | 0.68  | 1.14 | -0.37 | -0.25 |

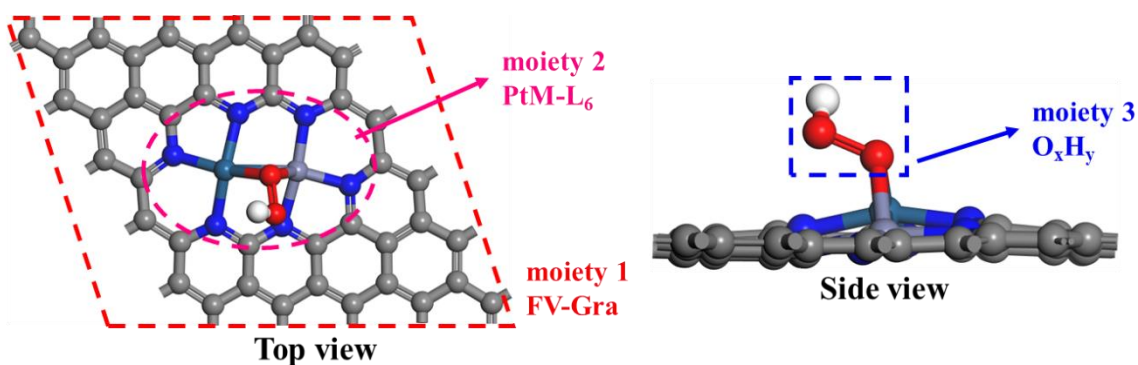

**Figure S5.** Schematic diagram of the definition of the three moieties for the intermediate species. Moiety 1, 2 and 3 represent the PtM-L<sub>6</sub>@Gra excluding the PtM-L<sub>6</sub> part (the PtM-L<sub>6</sub> part represent the Pt, M atoms and six coordinated atoms) (moiety 1), the PtM-L<sub>6</sub> part (moiety 2), and the adsorbed O<sub>x</sub>H<sub>y</sub> intermediate species (moiety 3), respectively.

**Table S11.** Charge variation of the three moieties (PtM-L<sub>6</sub>, O<sub>x</sub>H<sub>y</sub> and FV-Gra) along the most favorable reaction pathway on the 9 selected catalysts. The definition of moieties following Figure S5. The positive and negative charge values represent gain and loss of electrons, respectively.

| *O <sub>x</sub> H <sub>y</sub> | Moiety             | PtCo-<br>C <sub>6</sub> @<br>Gra | PtZn-<br>C <sub>6</sub> @<br>Gra | PtCd-<br>C <sub>6</sub> @<br>Gra | PtFe-<br>C <sub>6</sub> @<br>Gra | PtCo-<br>N <sub>6</sub> @<br>Gra | PtFe-<br>N <sub>6</sub> @<br>Gra | PtMn-<br>N <sub>6</sub> @<br>Gra | PtIr-<br>N <sub>6</sub> @<br>Gra | PtZn-<br>B <sub>6</sub> @<br>Gra |
|--------------------------------|--------------------|----------------------------------|----------------------------------|----------------------------------|----------------------------------|----------------------------------|----------------------------------|----------------------------------|----------------------------------|----------------------------------|
| *O <sub>2</sub>                | PtM-L <sub>6</sub> | -0.51                            | 0.04                             | -0.40                            | -0.24                            | -0.11                            | -0.24                            | -0.35                            | -0.52                            | -0.81                            |
|                                | FV-Gra             | 0.01                             | -0.44                            | 0.08                             | -0.19                            | -0.33                            | -0.27                            | -0.14                            | 0.03                             | -0.01                            |
|                                | O <sub>2</sub>     | 0.50                             | 0.40                             | 0.33                             | 0.43                             | 0.45                             | 0.51                             | 0.50                             | 0.49                             | 0.83                             |
| *OOH                           | PtM-L <sub>6</sub> | 0.05                             | -0.30                            | -0.14                            | 0.04                             | 0.03                             | -0.12                            | 0.02                             | -0.01                            | 0.16                             |
|                                | FV-Gra             | 0.10                             | 0.18                             | -0.10                            | 0.02                             | -0.01                            | 0.08                             | -0.34                            | 0.05                             | 0.16                             |
|                                | OOH                | -0.15                            | 0.12                             | 0.24                             | -0.06                            | -0.03                            | 0.04                             | 0.32                             | -0.03                            | -0.32                            |
| *O                             | PtM-L <sub>6</sub> | -0.30                            | -0.24                            | 0.14                             | 0.25                             | -0.53                            | 0.01                             | -0.17                            | -0.04                            | -0.16                            |
|                                | FV-Gra             | -0.09                            | -0.04                            | -0.19                            | -0.44                            | 0.21                             | -0.07                            | 0.39                             | -0.13                            | -0.22                            |
|                                | O                  | 0.39                             | 0.28                             | 0.05                             | 0.19                             | 0.32                             | 0.06                             | -0.23                            | 0.16                             | 0.38                             |
| *OH                            | PtM-L <sub>6</sub> | -0.01                            | 0.21                             | -0.11                            | -0.22                            | -0.01                            | -0.11                            | 0.13                             | 0.13                             | 0.13                             |
|                                | FV-Gra             | 0.30                             | 0.11                             | 0.18                             | 0.41                             | 0.34                             | 0.27                             | -0.05                            | 0.07                             | 0.28                             |
|                                | OH                 | -0.29                            | -0.32                            | -0.07                            | -0.18                            | -0.33                            | -0.16                            | -0.09                            | -0.20                            | -0.41                            |

**Table S12.** The  $d^*(\text{Pt-M})$ ,  $d^*_{\text{O}_2}(\text{Pt-M})$ ,  $d^*_{\text{OOH}}(\text{Pt-M})$ ,  $d^*_{\text{O}}(\text{Pt-M})$ ,  $d^*_{\text{OH}}(\text{Pt-M})$  and  $\text{avg}[d_a(\text{Pt-M})]$  of 21 catalysts were listed.

| PtM-L <sub>6</sub> @Gra  | $d^*(\text{Pt-M})$ | $d^*_{\text{O}_2}(\text{Pt-M})$ | $d^*_{\text{OOH}}(\text{Pt-M})$ | $d^*_{\text{O}}(\text{Pt-M})$ | $d^*_{\text{OH}}(\text{Pt-M})$ | $\text{avg}[d_a(\text{Pt-M})]$ |
|--------------------------|--------------------|---------------------------------|---------------------------------|-------------------------------|--------------------------------|--------------------------------|
| PtCd-B <sub>6</sub> @Gra | 2.45               | 2.62                            | 2.99                            | 3.02                          | 3.04                           | 2.83                           |
| PtNi-B <sub>6</sub> @Gra | 2.32               | 2.55                            | 2.59                            | 2.54                          | 2.63                           | 2.53                           |
| PtZn-B <sub>6</sub> @Gra | 2.32               | 2.62                            | 2.79                            | 2.74                          | 2.79                           | 2.65                           |
| PtCd-C <sub>6</sub> @Gra | 2.52               | 2.69                            | 2.69                            | 2.73                          | 2.70                           | 2.67                           |
| PtCo-C <sub>6</sub> @Gra | 2.42               | 2.73                            | 2.66                            | 2.63                          | 2.70                           | 2.63                           |
| PtFe-C <sub>6</sub> @Gra | 2.47               | 2.53                            | 2.62                            | 2.56                          | 2.59                           | 2.55                           |
| PtIr-C <sub>6</sub> @Gra | 2.43               | 2.57                            | 2.68                            | 2.68                          | 2.72                           | 2.62                           |
| PtMn-C <sub>6</sub> @Gra | 2.47               | 2.55                            | 2.57                            | 2.46                          | 2.56                           | 2.52                           |
| PtRh-C <sub>6</sub> @Gra | 2.45               | 2.71                            | 2.74                            | 2.71                          | 2.72                           | 2.67                           |
| PtRu-C <sub>6</sub> @Gra | 2.42               | 2.60                            | 2.69                            | 2.59                          | 2.70                           | 2.60                           |
| PtZn-C <sub>6</sub> @Gra | 2.49               | 2.61                            | 2.63                            | 2.66                          | 2.64                           | 2.60                           |
| PtCd-N <sub>6</sub> @Gra | 2.47               | 2.73                            | 2.92                            | 2.99                          | 2.97                           | 2.82                           |
| PtCo-N <sub>6</sub> @Gra | 2.34               | 2.41                            | 2.46                            | 2.51                          | 2.56                           | 2.46                           |
| PtFe-N <sub>6</sub> @Gra | 2.33               | 2.41                            | 2.44                            | 2.45                          | 2.46                           | 2.42                           |
| PtIr-N <sub>6</sub> @Gra | 2.40               | 2.47                            | 2.51                            | 2.50                          | 2.51                           | 2.48                           |
| PtMn-N <sub>6</sub> @Gra | 2.32               | 2.38                            | 2.41                            | 2.45                          | 2.40                           | 2.39                           |
| PtNi-N <sub>6</sub> @Gra | 2.37               | 2.39                            | 2.38                            | 2.67                          | 2.55                           | 2.47                           |
| PtOs-N <sub>6</sub> @Gra | 2.38               | 2.48                            | 2.49                            | 2.50                          | 2.47                           | 2.46                           |
| PtRh-N <sub>6</sub> @Gra | 2.41               | 2.47                            | 2.51                            | 2.51                          | 2.51                           | 2.48                           |
| PtRu-N <sub>6</sub> @Gra | 2.36               | 2.47                            | 2.48                            | 2.49                          | 2.45                           | 2.45                           |
| PtZn-N <sub>6</sub> @Gra | 2.43               | 2.54                            | 2.58                            | 2.65                          | 2.60                           | 2.56                           |

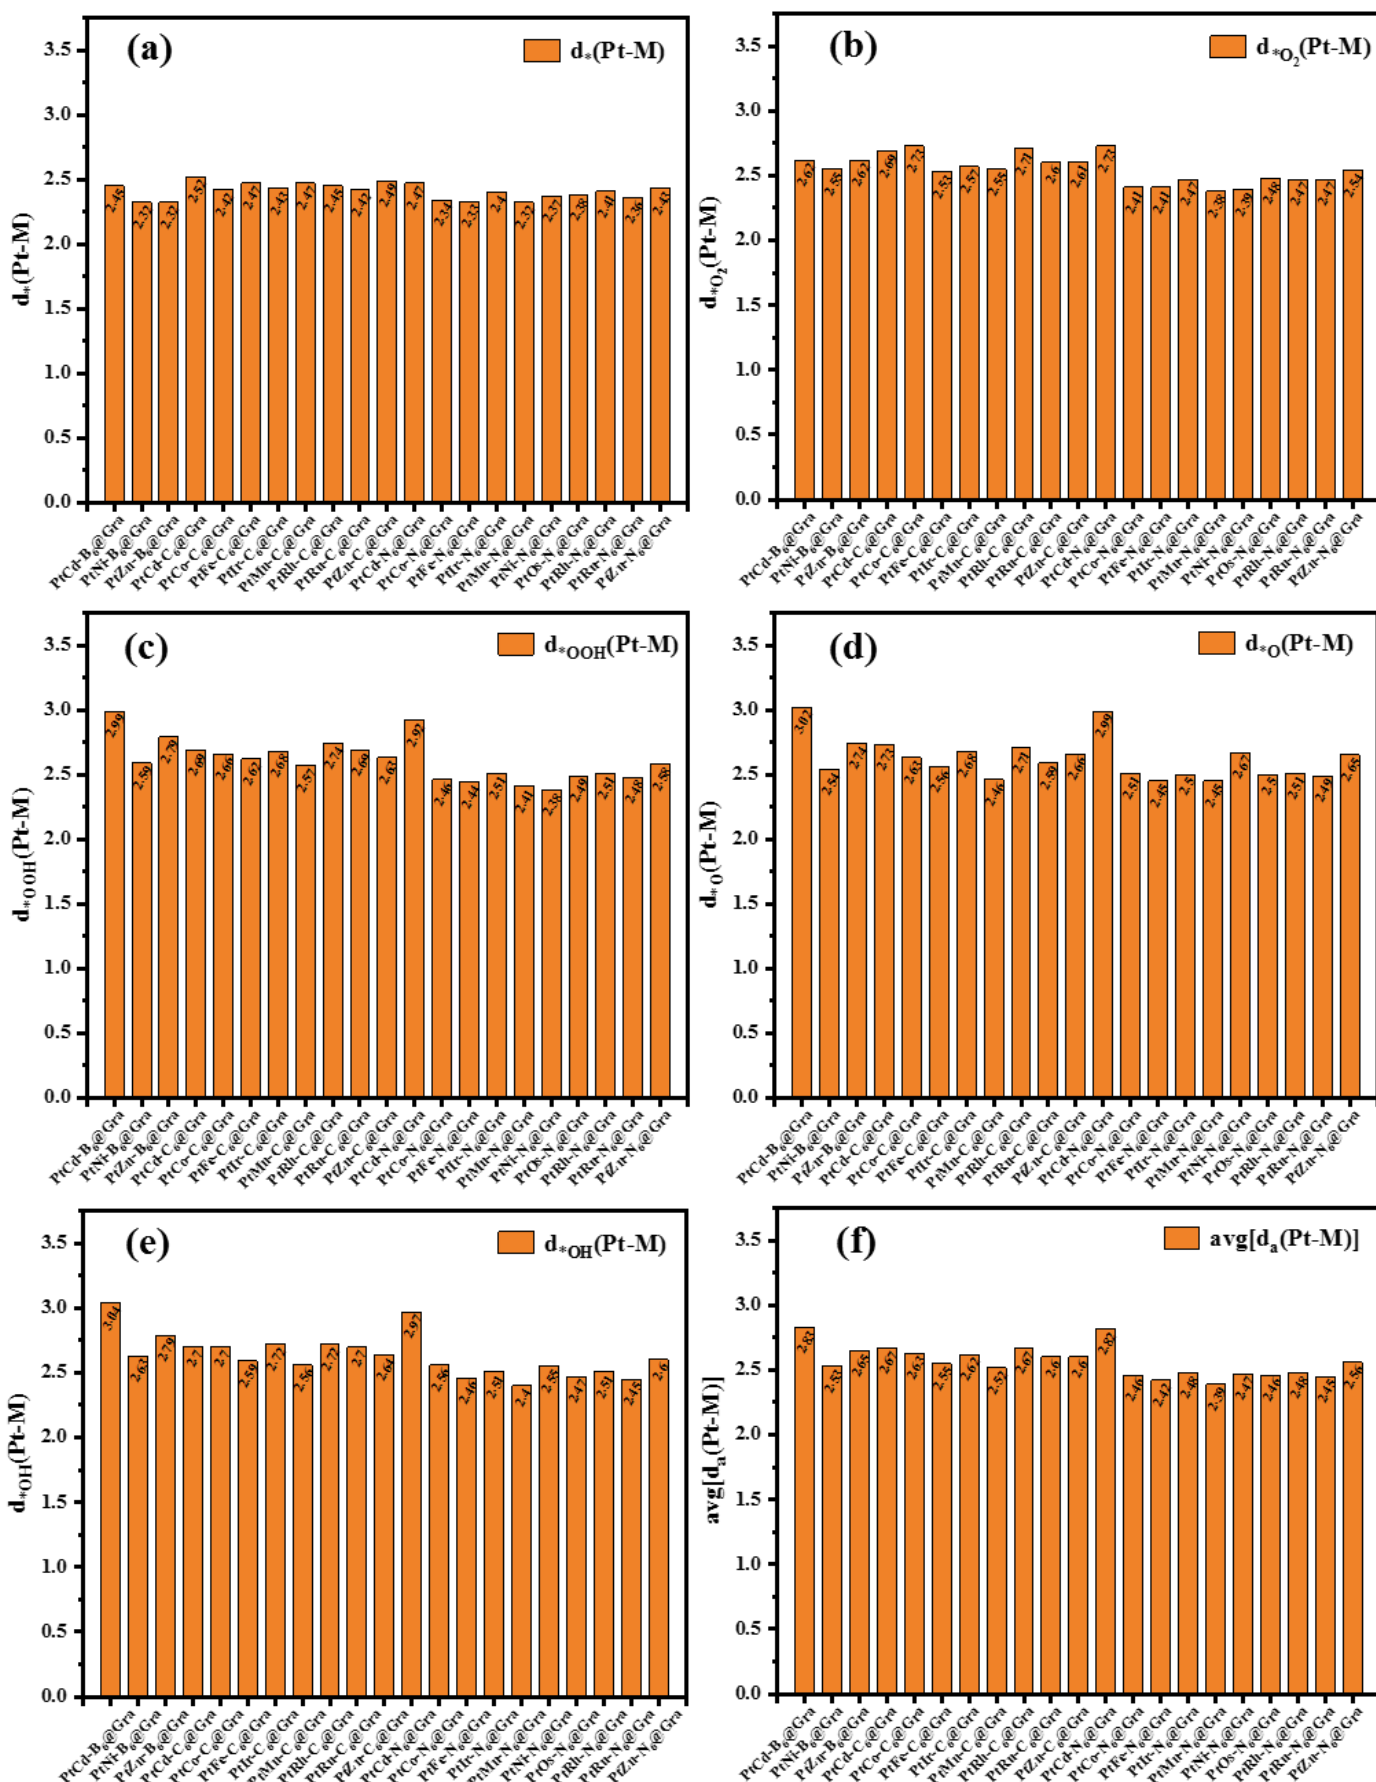

**Figure S6.** The diagrams of Pt-M bond length values of 21 catalysts substrates and various intermediates. (a)  $d^*(\text{Pt-M})$ , (b)  $d^*_{\text{O}_2}(\text{Pt-M})$ , (c)  $d^*_{\text{OOH}}(\text{Pt-M})$ , (d)  $d^*_{\text{O}}(\text{Pt-M})$ , (e)  $d^*_{\text{OH}}(\text{Pt-M})$ , and (f)  $\text{avg}[d_a(\text{Pt-M})]$ .

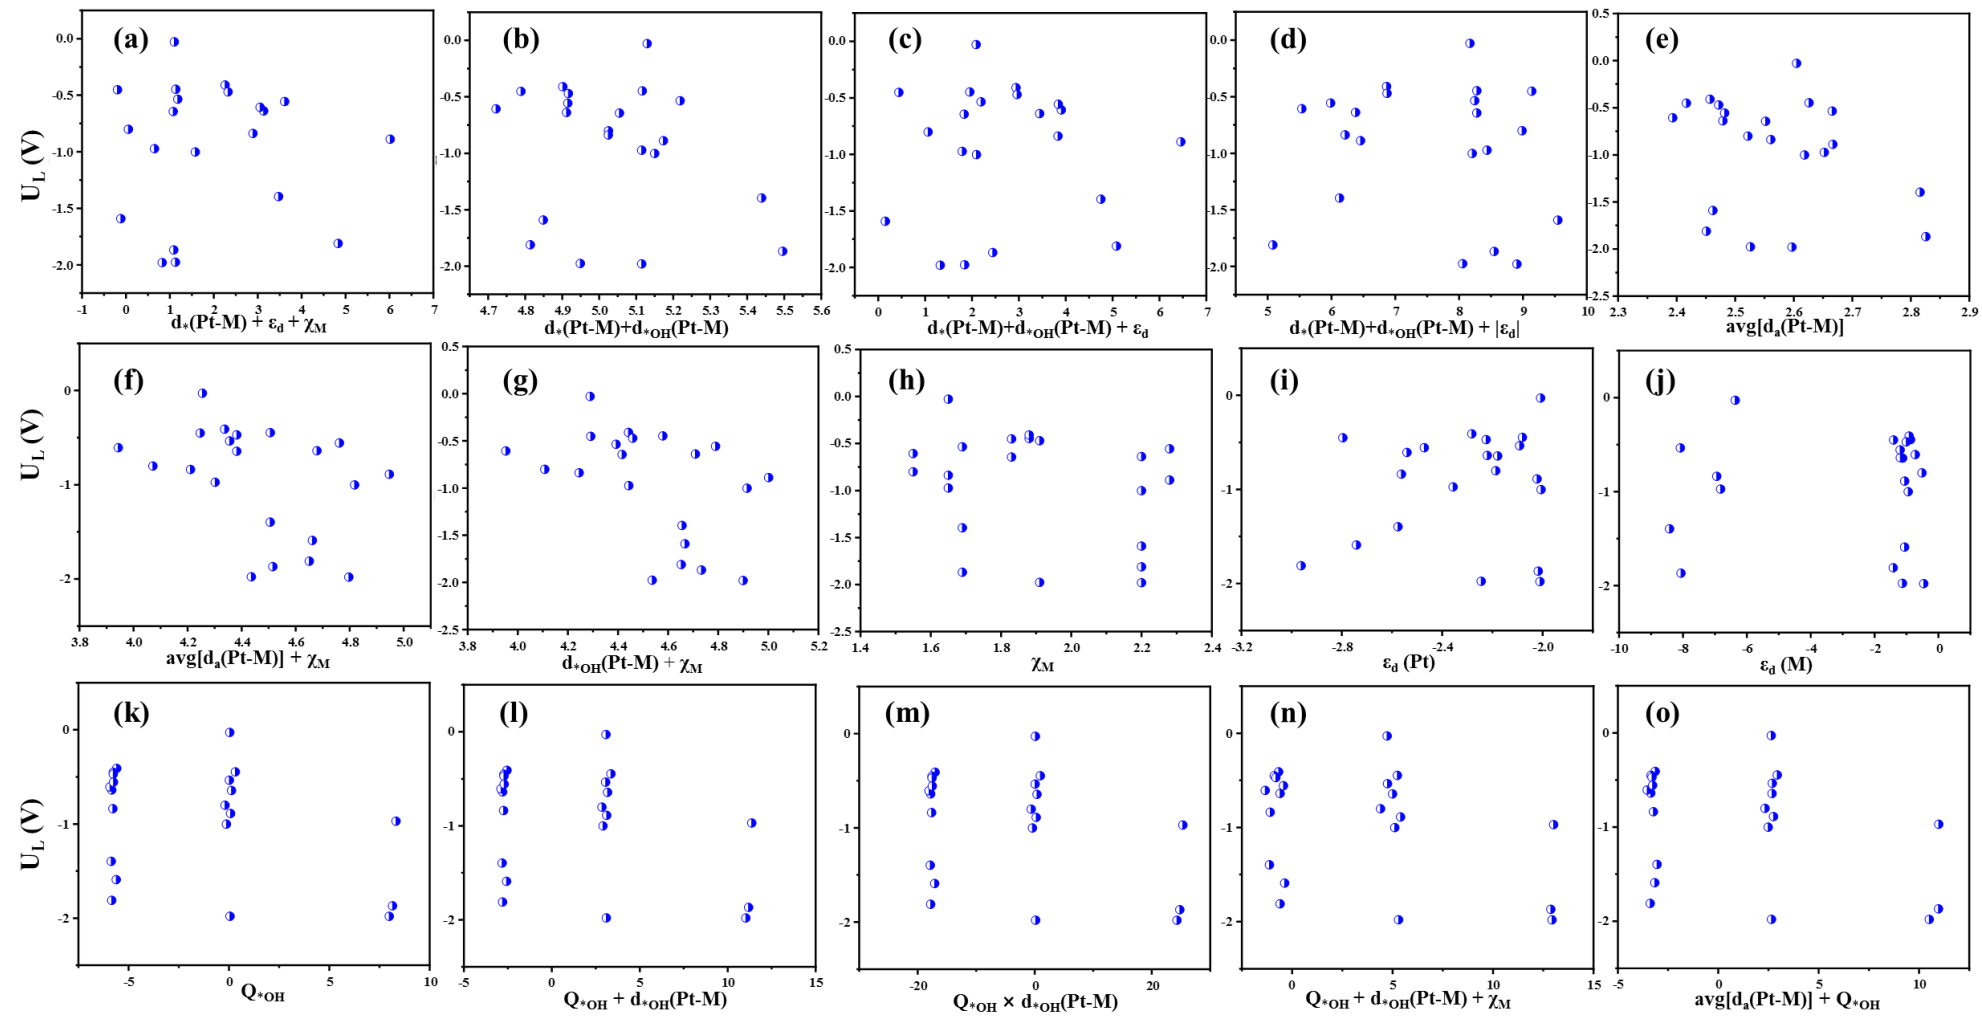

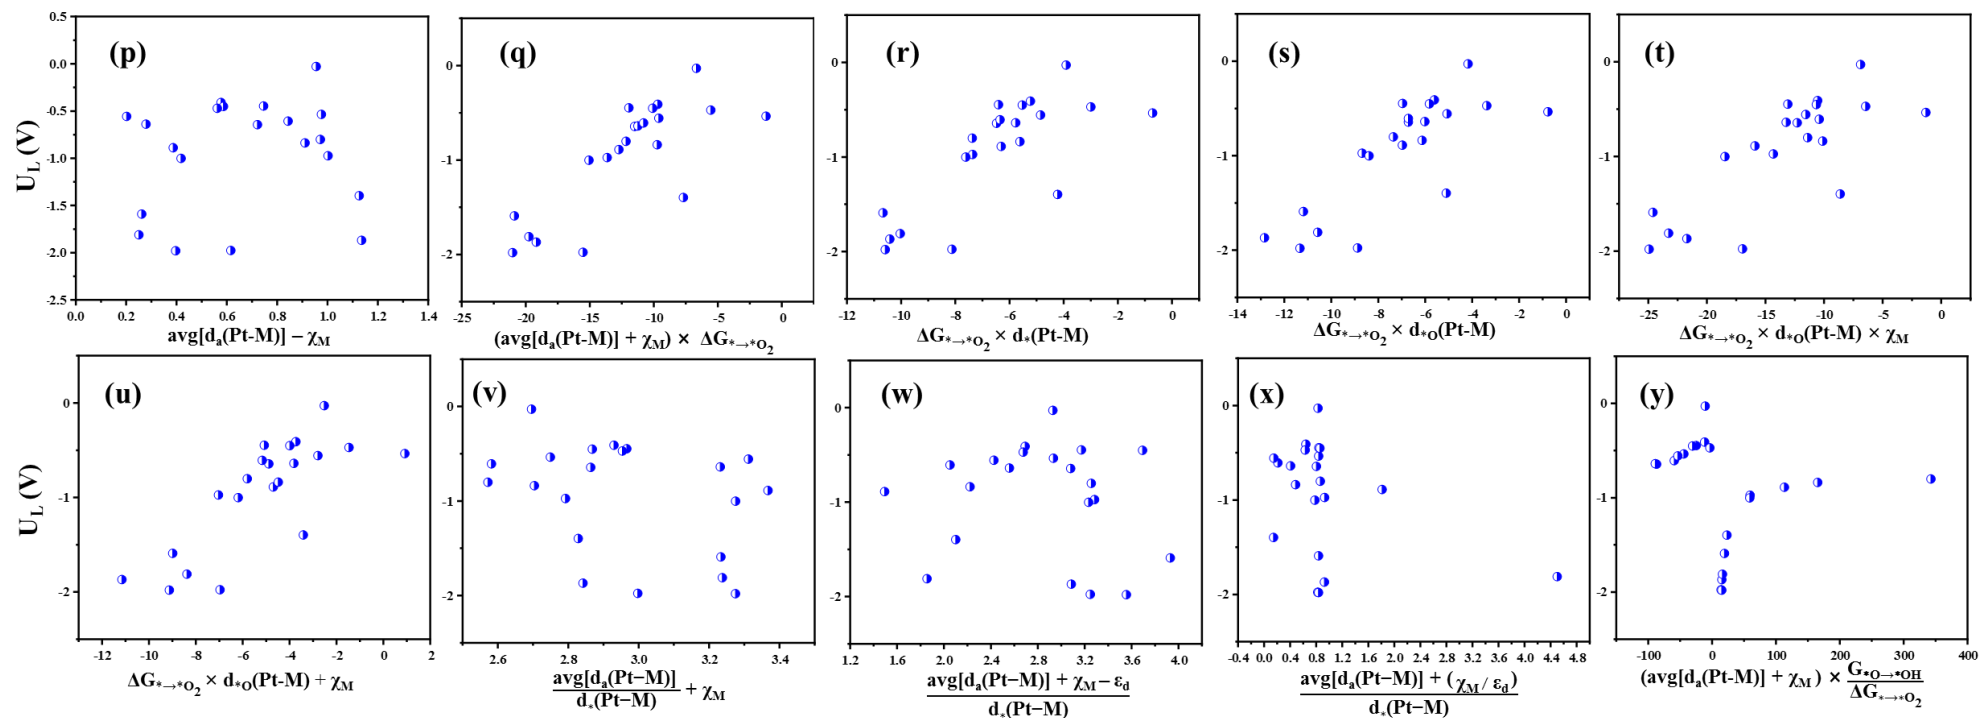

**Figure S7.** There is no clear structure-activity relationship between various descriptors and the limiting potential ( $U_L$ ) after many tentative trial and error.  $\Delta G_{* \rightarrow *O_2}$  and  $\Delta G_{*O \rightarrow *OH}$  represent the Gibbs free energy change of  $O_2$  adsorption, the second protonation step under basic condition, respectively. The  $d_*(Pt-M)$ ,  $d_{*O}(Pt-M)$ ,  $d_{*OH}(Pt-M)$  represent the distance between the active center metals Pt and M of the free substrate, substrate adsorbed O intermediate, substrate adsorbed OH intermediate, respectively.  $avg[d_a(Pt-M)]$  represents the average value of the distance of the active center metals Pt and M of the substrates and intermediates.



**Table S13.** The O-O bond length (Å) of free O<sub>2</sub> (g), \*O<sub>2</sub> and \*OOH on the 16 selected PtM-L<sub>6</sub>@Gra catalysts.

| PtM-L <sub>6</sub> @Gra  | O <sub>2</sub> (g) | *O <sub>2</sub> | *OOH |
|--------------------------|--------------------|-----------------|------|
| PtCd-C <sub>6</sub> @Gra | 1.21               | 1.28            | 1.49 |
| PtCo-C <sub>6</sub> @Gra | 1.21               | 1.34            | 1.46 |
| PtFe-C <sub>6</sub> @Gra | 1.21               | 1.27            | 1.48 |
| PtZn-C <sub>6</sub> @Gra | 1.21               | 1.29            | 1.48 |
| PtNi-C <sub>6</sub> @Gra | 1.21               | 1.26            | 1.46 |
| PtMn-C <sub>6</sub> @Gra | 1.21               | 1.28            | 1.98 |
| PtRh-C <sub>6</sub> @Gra | 1.21               | 1.29            | 1.46 |
| PtIr-C <sub>6</sub> @Gra | 1.21               | 1.29            | 1.48 |
| PtCo-N <sub>6</sub> @Gra | 1.21               | 1.28            | 1.46 |
| PtFe-N <sub>6</sub> @Gra | 1.21               | 1.29            | 1.68 |
| PtIr-N <sub>6</sub> @Gra | 1.21               | 1.30            | 1.50 |
| PtMn-N <sub>6</sub> @Gra | 1.21               | 1.29            | 1.98 |
| PtNi-N <sub>6</sub> @Gra | 1.21               | 1.28            | 1.42 |
| PtRh-N <sub>6</sub> @Gra | 1.21               | 1.29            | 1.47 |
| PtZn-N <sub>6</sub> @Gra | 1.21               | 1.33            | 1.48 |
| PtZn-B <sub>6</sub> @Gra | 1.21               | 1.41            | 1.49 |

**Table S14.** The calculated cohesive energies ( $E_c$ , eV/atom) of PtM bulk and the binding energies ( $E_b$ , eV/atom) of Pt and M atoms embedded in  $N_6@Gra$  substrate, and the binding energy along with the cohesive energy ( $E_b+E_c$ ). "/" represents that the energy of the corresponding catalyst has not been obtained.

| metal | $E_b$  | $E_c$ | $E_b+E_c$ |
|-------|--------|-------|-----------|
| Sc    | -15.96 | 5.52  | -10.45    |
| Ti    | -16.94 | 6.22  | -10.72    |
| V     | -16.01 | 6.14  | -9.87     |
| Cr    | -14.40 | 5.41  | -8.99     |
| Mn    | -14.95 | 5.19  | -9.76     |
| Fe    | -15.55 | 5.88  | -9.67     |
| Co    | -16.00 | 6.13  | -9.87     |
| Ni    | -15.93 | 5.80  | -10.13    |
| Cu    | -14.22 | 5.17  | -9.05     |
| Zn    | -11.47 | 3.89  | -7.57     |
| Y     | -14.22 | 5.49  | -8.73     |
| Zr    | -16.49 | 6.64  | -9.85     |
| Nb    | -16.33 | 6.92  | -9.40     |
| Mo    | -14.83 | 6.62  | -8.21     |
| Tc    | -15.52 | 7.00  | -8.52     |
| Ru    | -15.35 | 7.06  | -8.29     |
| Rh    | -15.51 | 6.50  | -9.01     |
| Pd    | -14.04 | 5.33  | -8.71     |
| Ag    | -11.91 | 4.67  | -7.23     |
| Cd    | -9.36  | 3.70  | -5.66     |
| Lu    | -13.18 | 5.48  | -7.70     |
| Hf    | -16.75 | 6.77  | -9.98     |
| Ta    | -17.55 | 7.70  | -9.85     |
| W     | -16.29 | 7.72  | -8.57     |
| Re    | -15.28 | 7.33  | -7.95     |
| Os    | -16.22 | 7.64  | -8.58     |
| Ir    | -16.65 | 7.34  | -9.31     |
| Pt    | -16.02 | 6.34  | -9.69     |
| Ag    | -12.82 | 5.01  | -7.80     |
| Hg    | /      | /     | /         |

**Table S15.** The calculated cohesive energies ( $E_c$ , eV/atom) of PtM bulk and the binding energies ( $E_b$ , eV/atom) of Pt and M atoms embedded in  $C_6@Gra$  substrate, and the binding energy along with the cohesive energy ( $E_b+E_c$ ). "/" represents that the energy of the corresponding catalyst has not been obtained.

| metal | $E_b$  | $E_c$ | $E_b+E_c$ |
|-------|--------|-------|-----------|
| Sc    | -18.16 | 5.52  | -12.64    |
| Ti    | -19.43 | 6.22  | -13.21    |
| V     | -18.48 | 6.14  | -12.34    |
| Cr    | -17.11 | 5.41  | -11.70    |
| Mn    | -17.94 | 5.19  | -12.75    |
| Fe    | -18.68 | 5.88  | -12.79    |
| Co    | -19.19 | 6.13  | -13.06    |
| Ni    | -19.13 | 5.80  | -13.33    |
| Cu    | -17.34 | 5.17  | -12.17    |
| Zn    | -14.72 | 3.89  | -10.83    |
| Y     | -16.52 | 5.49  | -11.02    |
| Zr    | -19.09 | 6.64  | -12.44    |
| Nb    | -18.74 | 6.92  | -11.82    |
| Mo    | -17.71 | 6.62  | -11.10    |
| Tc    | -18.74 | 7.00  | -11.74    |
| Ru    | -19.25 | 7.06  | -12.19    |
| Rh    | -19.16 | 6.50  | -12.66    |
| Pd    | -17.62 | 5.33  | -12.29    |
| Ag    | -15.39 | 4.67  | -10.72    |
| Cd    | -12.97 | 3.70  | -9.27     |
| Lu    | -16.49 | 5.48  | -11.00    |
| Hf    | -19.39 | 6.77  | -12.63    |
| Ta    | -20.07 | 7.70  | -12.37    |
| W     | -19.43 | 7.72  | -11.71    |
| Re    | -18.78 | 7.33  | -11.45    |
| Os    | -19.97 | 7.64  | -12.32    |
| Ir    | -20.74 | 7.34  | -13.40    |
| Pt    | -20.13 | 6.34  | -13.79    |
| Ag    | -16.95 | 5.01  | -11.94    |
| Hg    | /      | /     | /         |

**Table S16.** The calculated cohesive energies ( $E_c$ , eV/atom) of PtM bulk and the binding energies ( $E_b$ , eV/atom) of Pt and M atoms embedded in  $B_6@Gra$  substrate, and the binding energy along with the cohesive energy ( $E_b+E_c$ ). "/" represents that the energy of the corresponding catalyst has not been obtained.

| metal | $E_b$  | $E_c$ | $E_b+E_c$ |
|-------|--------|-------|-----------|
| Sc    | -11.52 | 5.52  | -6.01     |
| Ti    | -12.70 | 6.22  | -6.47     |
| V     | -11.42 | 6.14  | -5.28     |
| Cr    | -8.68  | 5.41  | -3.27     |
| Mn    | -10.21 | 5.19  | -5.02     |
| Fe    | -11.59 | 5.88  | -5.71     |
| Co    | -11.92 | 6.13  | -5.79     |
| Ni    | -11.97 | 5.80  | -6.17     |
| Cu    | -11.10 | 5.17  | -5.94     |
| Zn    | -9.33  | 3.89  | -5.43     |
| Y     | -9.48  | 5.49  | -3.98     |
| Zr    | -12.25 | 6.64  | -5.61     |
| Nb    | -11.96 | 6.92  | -5.04     |
| Mo    | -10.23 | 6.62  | -3.62     |
| Tc    | -11.56 | 7.00  | -4.56     |
| Ru    | -12.17 | 7.06  | -5.11     |
| Rh    | -12.01 | 6.50  | -5.51     |
| Pd    | -10.16 | 5.33  | -4.84     |
| Ag    | -8.54  | 4.67  | -3.87     |
| Cd    | -7.16  | 3.70  | -3.46     |
| Lu    | -9.57  | 5.48  | -4.09     |
| Hf    | -12.49 | 6.77  | -5.72     |
| Ta    | -12.16 | 7.70  | -4.46     |
| W     | -11.89 | 7.72  | -4.17     |
| Re    | -11.10 | 7.33  | -3.77     |
| Os    | -12.35 | 7.64  | -4.71     |
| Ir    | -13.22 | 7.34  | -5.87     |
| Pt    | -11.74 | 6.34  | -5.40     |
| Ag    | -9.96  | 5.01  | -4.94     |
| Hg    | /      | /     | /         |

**Table S17.** The calculated binding energy of the Pt and M atoms embedded in PtM-L<sub>6</sub>@Gra (E<sub>b</sub>, eV), standard dissolution potentials (U<sub>diss</sub><sup>o</sup>, pH = 0), number of electrons (N<sub>e</sub>) involved in the dissolution for the pure metals, and computed dissolution potentials (U<sub>diss</sub><sup>Pt</sup>, U<sub>diss</sub><sup>M</sup>) for DACs. The minimum dissolution potential (U<sub>diss</sub><sup>min</sup>) is taken to represent the dissolution potential of the whole system.

| PtM-L <sub>6</sub> @Gra  | E <sub>b</sub> /2 | Pt in PtM-L <sub>6</sub> @Gra  |                |                                 | M in PtM-L <sub>6</sub> @Gra   |                |                                | U <sub>diss</sub> <sup>min</sup> |
|--------------------------|-------------------|--------------------------------|----------------|---------------------------------|--------------------------------|----------------|--------------------------------|----------------------------------|
|                          |                   | U <sub>diss</sub> <sup>o</sup> | N <sub>e</sub> | U <sub>diss</sub> <sup>Pt</sup> | U <sub>diss</sub> <sup>o</sup> | N <sub>e</sub> | U <sub>diss</sub> <sup>M</sup> |                                  |
| PtCo-C <sub>6</sub> @Gra | -19.19            | 1.18                           | 2              | 5.98                            | -0.28                          | 2              | 4.52                           | 4.52                             |
| PtNi-C <sub>6</sub> @Gra | -19.13            | 1.18                           | 2              | 5.96                            | -0.26                          | 2              | 4.52                           | 4.52                             |
| PtZn-C <sub>6</sub> @Gra | -14.72            | 1.18                           | 2              | 4.86                            | -0.76                          | 2              | 2.92                           | 2.92                             |
| PtFe-N <sub>6</sub> @Gra | -15.55            | 1.18                           | 2              | 5.07                            | -0.45                          | 2              | 3.44                           | 3.44                             |
| PtCo-N <sub>6</sub> @Gra | -16.00            | 1.18                           | 2              | 5.18                            | -0.28                          | 2              | 3.72                           | 3.72                             |
| PtNi-N <sub>6</sub> @Gra | -15.93            | 1.18                           | 2              | 5.16                            | -0.26                          | 2              | 3.72                           | 3.72                             |

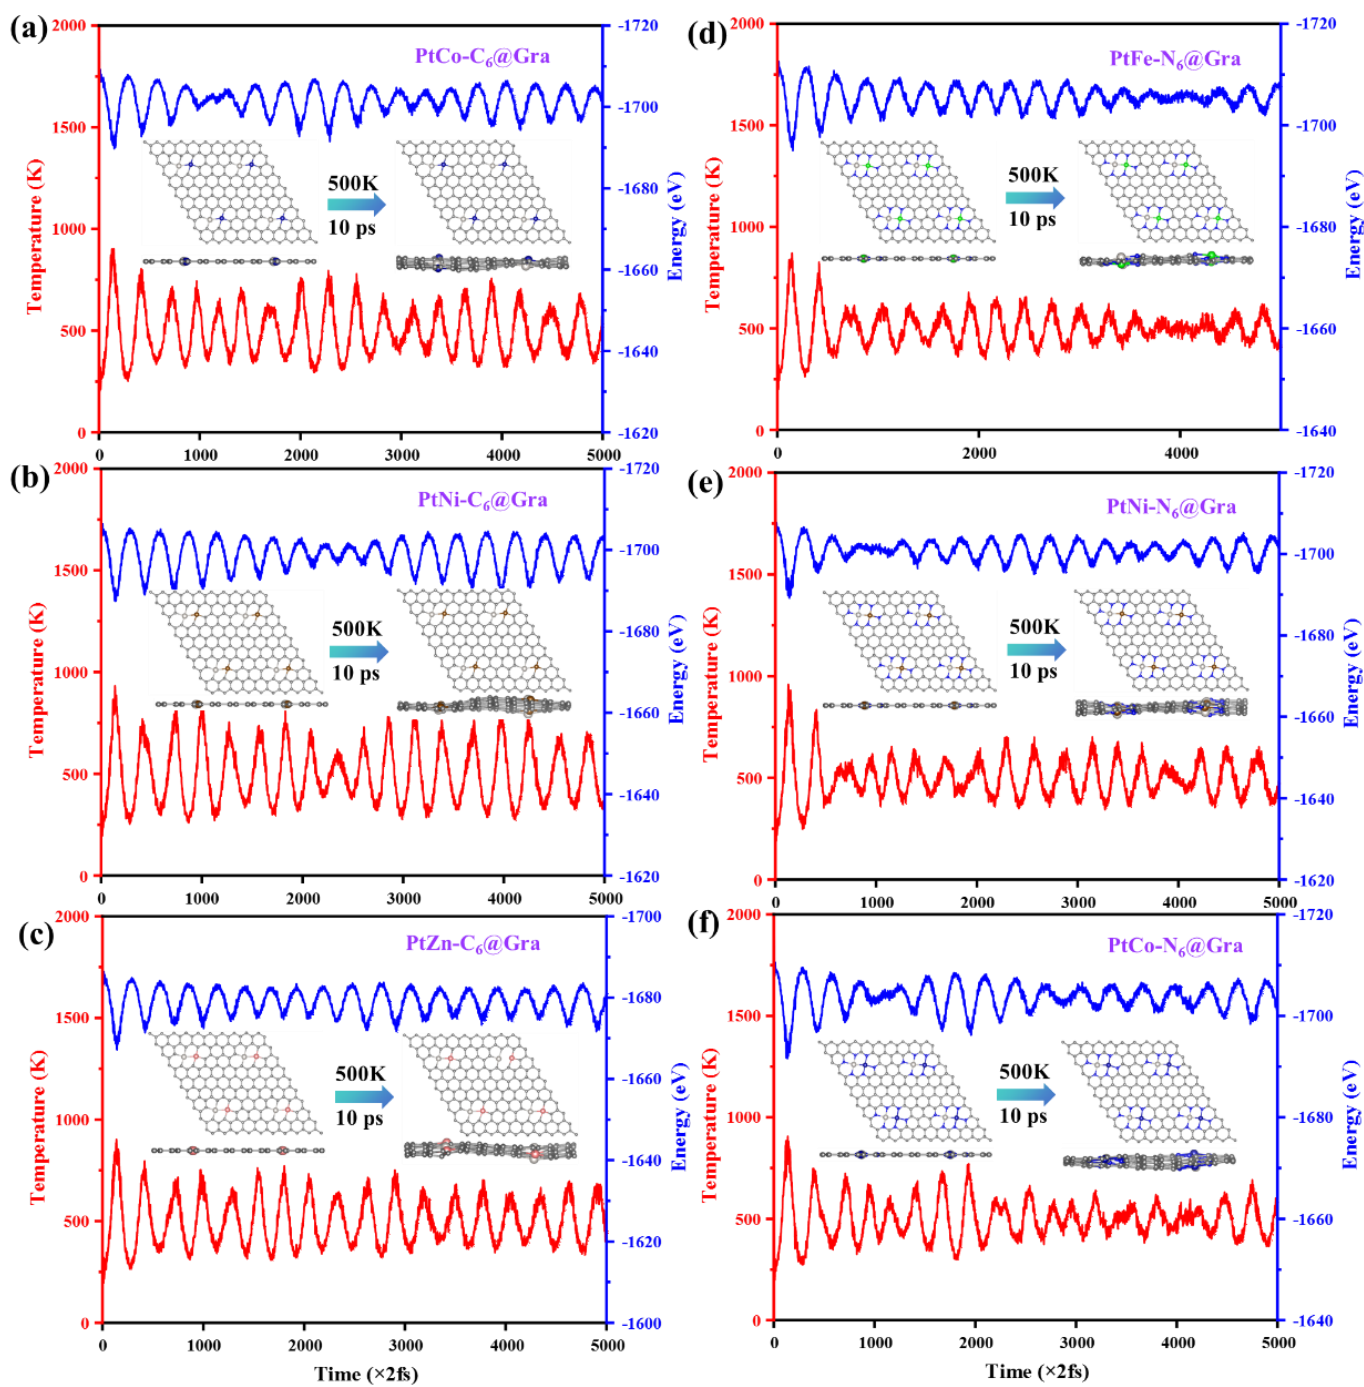

**Figure S8.** The variations of total energy and temperature during AIMD simulations of (a) PtCo-C<sub>6</sub>@Gra, (b) PtNi-C<sub>6</sub>@Gra, (c) PtZn-C<sub>6</sub>@Gra, (d) PtFe-N<sub>6</sub>@Gra, (e) PtNi-N<sub>6</sub>@Gra, (f) PtCo-N<sub>6</sub>@Gra catalysts under 500 K for 10 ps with a time step of 2 fs.
